# Supplementary material for: Cu(OAc)2-catalyzed three-component cycloaddition of malonates, nitrosoarenes and alkenes: access to isoxazolidines
Source: Royal Society of Chemistry journal article supplement (doi:10.1039/d3ob00189j), 2023-01-01
Supplement: d3ob00189j1.pdf [file d3ob00189j1.pdf]

# Supporting Information

## **Cu(OAc)<sub>2</sub>-Catalyzed Three-Component Cycloaddition of Malonates, Nitrosoarenes and Alkenes: Access to Isoxazolidines**

**Yuting Wu, Qiang Liu, Shuangping Huang, Chaofeng Zhang, Wenlong Wei and Xing Li\***

College of Biomedical Engineering, Taiyuan University of Technology, 79 West Yingze Street,  
Taiyuan 030024, People's Republic of China.

E-mail: [lixing@tyut.edu.cn](mailto:lixing@tyut.edu.cn)

### **Contents**

#### **Page no**

|                                                                                                     |      |
|-----------------------------------------------------------------------------------------------------|------|
| 1. General                                                                                          | S-2  |
| 2. General procedure for cycloaddition of malonates, nitrosoarenes and alkenes                      | S-2  |
| 3. Characterization data for the cycloaddition products <b>4</b>                                    | S-2  |
| 4. Characterization data for the intermediate <b>5a</b>                                             | S-15 |
| 5. References                                                                                       | S-16 |
| 6. <sup>1</sup> H-NMR and <sup>13</sup> C-NMR spectra for the intermediate <b>5a</b>                | S-16 |
| 7. <sup>1</sup> H-NMR and <sup>13</sup> C-NMR spectra and NOESY for cycloaddition products <b>4</b> | S-17 |

## 1. General

Unless otherwise indicated, all reagents were purchased from commercial sources and used without further purification. And deuterated solvents were purchased from Aldrich. Refinement of the mixed system through column chromatography which was performed on silica gel (200–300 mesh) with petroleum ether (solvent A)/ethyl acetate (solvent B) gradients as elution. In addition, all yields were referred to isolated yields (average of two runs) of compounds unless otherwise specified. The known compounds were partly characterized by melting points (for solid samples),  $^1\text{H}$  NMR, and compared to authentic samples or the literature data. Melting points were measured with a RD-II digital melting point apparatus and were uncorrected.  $^1\text{H}$  NMR data were acquired at 300 K on a Bruker Advance 600 MHz or 400 MHz spectrometer and  $^{13}\text{C}$  NMR data were acquired at 300 K on a Bruker Advance 150 MHz or 100 MHz spectrometer using  $\text{CDCl}_3$  as a solvent. Chemical shifts are reported in ppm from tetramethylsilane with the solvent  $\text{CDCl}_3$  resonance as the internal standard ( $\text{CDCl}_3$   $\delta = 7.26, 77.0$ ). Spectra are reported as follows: chemical shift ( $\delta = \text{ppm}$ ), multiplicity (s = singlet, d = doublet, t = triplet, q = quartet, m = multiplet), coupling constants (Hz), integration, and assignment.

## 2. General procedure for cycloaddition of malonates, nitrosoarenes and alkenes

To a tube equipped with a magnetic stir bar was added nitrosoarene **1** (0.24 mmol, 1.2 equiv),  $\text{Cu}(\text{OAc})_2$  (3.0 mg, 8.0 mol%), malonate **2** (0.24 mmol, 1.2 equiv) and  $\text{CH}_3\text{CN}$  (1.0 mL) in turn. The reaction system was then heated to 80 °C (oil bath) and stirred for 8 h. Subsequently, alkene **3** (0.2 mmol) was added and the reaction system was stirred until alkene **3** was completely consumed as determined by TLC. At last, the reaction mixture was purified by silica gel column chromatography to afford the desired pure cycloaddition product **4**.

### 3. Characterization data for the cycloaddition products 4

#### Diethyl 2,5-diphenylisoxazolidine-3,3-dicarboxylate (4aaa) <sup>lit 1</sup>

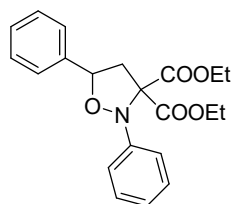

yellow oil, yield: 95%; TLC,  $R_f = 0.3$  (PE:EtOAc = 20:1);  $^1\text{H}$  NMR ( $\text{CDCl}_3$ , 400 MHz),  $\delta$  7.57 (d,  $J = 6.8$  Hz, 2H), 7.43–7.33 (m, 5H), 7.26 (t,  $J = 7.2$  Hz, 2H), 7.04 (t,  $J = 7.6$  Hz, 1H), 5.37 (dd,  $J = 9.6, 6.8$  Hz, 1H), 4.24 (q,  $J = 7.2$  Hz, 2H), 4.07–3.98 (m, 1H), 3.97–3.88 (m, 1H), 3.27–3.11 (m, 2H), 1.2 (t,  $J = 7.2$  Hz, 3H), 1.02 (t,  $J = 7.2$  Hz, 3H) ppm.

#### Diethyl 2-phenyl-5-(*o*-tolyl)isoxazolidine-3,3-dicarboxylate (4aab) <sup>lit 1</sup>

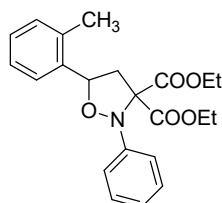

yellow oil, yield: 80%; TLC,  $R_f = 0.3$  (PE:EtOAc = 20:1);  $^1\text{H}$  NMR ( $\text{CDCl}_3$ , 400 MHz),  $\delta$  7.76–7.58 (m, 2H), 7.55 (d,  $J = 8.8$  Hz, 1H), 7.45–7.33 (m, 1H), 7.30–7.14 (m, 5H), 5.64 (dd,  $J = 9.6, 6.4$  Hz, 1H), 4.31–4.17 (m, 2H), 4.13–4.00 (m, 1H), 3.99–3.89 (m, 1H), 3.31 (dd,  $J = 12.8, 6.0$  Hz, 1H), 3.12–2.98 (m, 1H), 2.39 (s, 3H), 1.23 (t,  $J = 7.2$  Hz, 3H), 1.10 (t,  $J = 7.2$  Hz, 3H) ppm.

#### Diethyl 2-phenyl-5-(*m*-tolyl)isoxazolidine-3,3-dicarboxylate (4aac) <sup>lit 1</sup>

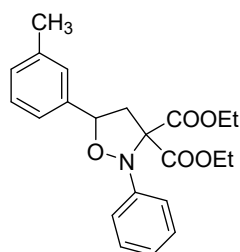

yellow oil, yield: 83%; TLC,  $R_f = 0.3$  (PE:EtOAc = 20:1);  $^1\text{H}$  NMR ( $\text{CDCl}_3$ , 600 MHz),  $\delta$  7.38–7.33 (m, 4H), 7.29 (t,  $J = 7.8$  Hz, 1H), 7.25–7.24 (m, 2H), 7.17 (d,  $J = 7.2$  Hz, 1H), 7.03 (t,  $J = 7.2$  Hz, 1H), 5.31 (dd,  $J = 9.6, 6.0$  Hz, 1H), 4.20 (q,  $J = 7.2$  Hz, 2H), 4.05–4.01 (m, 1H), 3.97–3.92 (m, 1H), 3.22 (dd,  $J =$

12.6, 6.0 Hz, 1H), 3.14 (dd,  $J = 12.6, 10.2$  Hz, 1H), 2.40 (s, 3H), 1.19 (t,  $J = 7.2$  Hz, 3H), 1.04 (t,  $J = 7.2$  Hz, 3H) ppm.

**Diethyl 2-phenyl-5-(*p*-tolyl)isoxazolidine-3,3-dicarboxylate (4aad)** <sup>lit 1</sup>

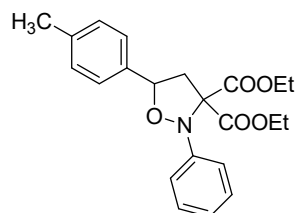

yellow oil, yield: 84%; TLC,  $R_f = 0.3$  (PE:EtOAc = 20:1);  $^1\text{H}$  NMR ( $\text{CDCl}_3$ , 400 MHz),  $\delta$  7.47 (d,  $J = 8.0$  Hz, 2H), 7.39 (dd,  $J = 9.6, 0.8$  Hz, 2H), 7.29–7.15 (m, 4H), 7.02 (t,  $J = 7.2$  Hz, 1H), 5.3 (dd,  $J = 9.2, 6.0$  Hz, 1H), 4.24 (q,  $J = 7.2$  Hz, 2H), 4.07–3.97 (m, 1H), 3.96–3.88 (m, 1H), 3.24–3.10 (m, 2H), 2.37–2.34 (s, 3H), 1.20 (t,  $J = 7.2$  Hz, 3H), 1.05 (t,  $J = 6.8$  Hz, 3H) ppm.

**Diethyl 5-(2,6-dimethylphenyl)-2-phenylisoxazolidine-3,3-dicarboxylate (4aae)** <sup>lit 1</sup>

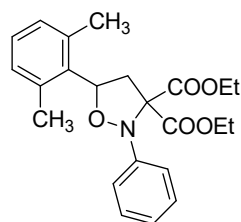

yellow oil, yield: 86%; TLC,  $R_f = 0.3$  (PE:EtOAc = 20:1);  $^1\text{H}$  NMR ( $\text{CDCl}_3$ , 400 MHz),  $\delta$  7.52 (s, 1H), 7.40 (dd,  $J = 2.4, 1.2$  Hz, 2H), 7.30–7.23 (m, 2H), 7.09–7.00 (m, 3H), 5.57 (q,  $J = 6.0$  Hz, 1H), 4.24–4.14 (m, 2H), 4.10–4.01 (m, 1H), 4.00–3.92 (m, 1H), 3.26 (dd,  $J = 6.8, 5.6$  Hz, 1H), 3.05 (dd,  $J = 10.0, 2.8$  Hz, 1H), 2.38 (s, 6H), 1.20 (t,  $J = 7.2$  Hz, 3H), 1.06 (t,  $J = 7.2$  Hz, 3H) ppm.

**Diethyl 5-(2-nitrophenyl)-2-phenylisoxazolidine-3,3-dicarboxylate (4aaf)** <sup>lit 1</sup>

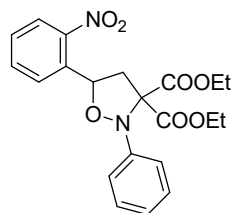

white solid, mp: 74–77 °C, yield: 87%; TLC,  $R_f = 0.3$  (PE:EtOAc = 20:1);  $^1\text{H}$  NMR ( $\text{CDCl}_3$ , 600 MHz),  $\delta$  7.69 (t,  $J = 8.0$  Hz, 1H), 7.47 (t,  $J = 8.0$  Hz, 1H), 7.45 (d,  $J = 8.0$  Hz, 2H), 7.33 (dd,  $J = 16.0, 7.6$  Hz, 2H), 7.09 (t,  $J = 9.6$  Hz, 1H), 5.96

(t,  $J = 7.2$  Hz, 1H), 4.12–3.98 (m, 4H), 3.78 (dd,  $J = 12.8, 7.6$  Hz, 1H), 2.96 (dd,  $J = 12.8, 7.2$  Hz, 1H), 1.07 (t,  $J = 7.2$  Hz, 6H) ppm.

**Diethyl 5-(3-nitrophenyl)-2-phenylisoxazolidine-3,3-dicarboxylate (4aag)** <sup>lit 1</sup>

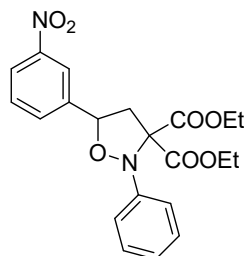

white solid, mp: 94–96 °C, yield: 94%; TLC,  $R_f = 0.3$  (PE:EtOAc = 20:1);  $^1\text{H}$  NMR ( $\text{CDCl}_3$ , 600 MHz),  $\delta$  8.42 (s, 1H), 8.24–8.19 (m, 1H), 7.94 (d,  $J = 8.0$  Hz, 1H), 7.63 (t,  $J = 8.0$  Hz, 1H), 7.44–7.36 (m, 2H), 7.28 (t,  $J = 7.2$  Hz, 2H), 7.12–7.05 (m, 1H), 5.50 (dd,  $J = 8.8, 7.2$  Hz, 1H), 4.23–4.11 (m, 2H), 4.10–4.01 (m, 1H), 4.00–3.91 (m, 1H), 3.39 (dd,  $J = 12.8, 6.8$  Hz, 1H), 3.17 (dd,  $J = 12.8, 6.8$  Hz, 1H), 3.17 (dd,  $J = 12.8, 8.4$  Hz, 1H), 1.16 (t,  $J = 7.2$  Hz, 3H), 1.04 (t,  $J = 7.2$  Hz, 3H) ppm.

**Diethyl 5-(4-nitrophenyl)-2-phenylisoxazolidine-3,3-dicarboxylate (4aah)** <sup>lit 1</sup>

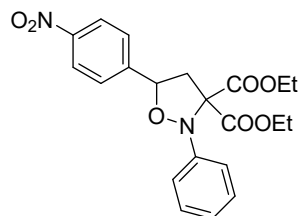

white solid, mp: 67–70 °C, yield: 96%; TLC,  $R_f = 0.3$  (PE:EtOAc = 20:1);  $^1\text{H}$  NMR ( $\text{CDCl}_3$ , 600 MHz),  $\delta$  8.24 (d,  $J = 8.4$  Hz, 2H), 7.71 (d,  $J = 8.4$  Hz, 2H), 7.39 (d,  $J = 7.8$  Hz, 2H), 7.28 (t,  $J = 7.8$  Hz, 2H), 7.09 (t,  $J = 7.2$  Hz, 1H), 5.45 (t,  $J = 7.2$  Hz, 1H), 4.18–4.12 (m, 2H), 4.06–4.01 (m, 1H), 3.97–3.92 (m, 1H), 3.35 (dd,  $J = 12.6, 6.6$  Hz, 1H), 3.07 (dd,  $J = 12.6, 8.4$  Hz, 1H), 1.15 (t,  $J = 7.2$  Hz, 3H), 1.02 (t,  $J = 7.2$  Hz, 3H) ppm.

**Diethyl 2-phenyl-5-(pyridin-2-yl)isoxazolidine-3,3-dicarboxylate (4aai)** <sup>lit 1</sup>

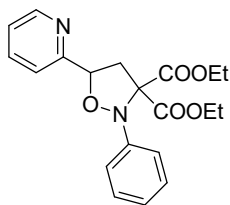

yellow oil, yield: 85%; TLC,  $R_f = 0.3$  (PE:EtOAc = 20:1);  $^1\text{H}$  NMR ( $\text{CDCl}_3$ , 600 MHz),  $\delta$  8.48 (d,  $J = 4.2$  Hz, 1H), 7.65–7.60 (m, 2H), 7.32 (d,  $J = 8.4$  Hz, 2H), 7.19 (t,  $J = 7.8$  Hz, 2H), 7.15–7.13 (m, 1H), 6.98 (t,  $J = 7.2$  Hz, 1H), 5.43 (t,  $J = 7.2$  Hz, 1H), 4.04–3.91 (m, 4H), 3.40 (dd,  $J = 13.2, 7.2$  Hz, 1H), 3.22 (dd,  $J = 12.6, 7.2$  Hz, 1H), 1.00–0.97 (m, 6H) ppm.

**Diethyl 2-phenyl-5-(pyridin-4-yl)isoxazolidine-3,3-dicarboxylate (4aaj)** <sup>lit 1</sup>

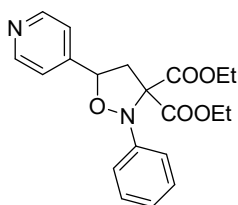

yellow oil, yield: 87%; TLC,  $R_f = 0.3$  (PE:EtOAc = 3:1);  $^1\text{H}$  NMR ( $\text{CDCl}_3$ , 600 MHz),  $\delta$  8.68 (s, 2H), 7.46 (s, 2H), 7.39 (d,  $J = 8.4$  Hz, 2H), 7.28 (t,  $J = 7.8$  Hz, 2H), 7.08 (t,  $J = 7.8$  Hz, 1H), 5.35 (t,  $J = 7.8$  Hz, 1H), 4.17–4.11 (m, 2H), 4.07–4.01 (m, 1H), 3.98–3.93 (m, 1H), 3.35 (dd,  $J = 13.2, 7.2$  Hz, 1H), 3.06 (dd,  $J = 13.2, 8.4$  Hz, 1H), 1.14 (t,  $J = 7.2$  Hz, 3H), 1.03 (t,  $J = 7.2$  Hz, 3H) ppm.

**Diethyl 5-(naphthalen-1-yl)-2-phenylisoxazolidine-3,3-dicarboxylate (4aak)** <sup>lit 1</sup>

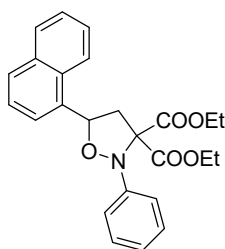

yellow oil, yield: 75%; TLC,  $R_f = 0.3$  (PE:EtOAc = 20:1);  $^1\text{H}$  NMR ( $\text{CDCl}_3$ , 600 MHz),  $\delta$  8.10 (d,  $J = 8.4$  Hz, 1H), 7.88 (t,  $J = 9.0$  Hz, 2H), 7.83 (d,  $J = 7.8$  Hz, 1H), 7.55–7.49 (m, 3H), 7.44 (d,  $J = 7.8$  Hz, 2H), 7.28 (t,  $J = 7.8$  Hz, 2H), 7.06 (t,  $J = 7.2$  Hz, 1H), 6.10 (dd,  $J = 9.0, 6.0$  Hz, 1H), 4.21 (q,  $J = 7.2$  Hz, 2H), 4.04–4.01 (m, 1H), 3.98–3.95 (m, 1H), 3.51 (dd,  $J = 12.6, 6.0$  Hz, 1H), 3.19 (dd,  $J = 12.6, 6.0$  Hz, 1H), 1.20 (t,  $J = 7.2$  Hz, 3H), 1.02 (t,  $J = 6.6$  Hz, 3H) ppm.

**Diethyl 5-(naphthalen-2-yl)-2-phenylisoxazolidine-3,3-dicarboxylate (4aal)** <sup>lit 1</sup>

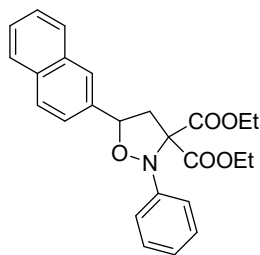

yellow oil, yield: 87%; TLC,  $R_f = 0.3$  (PE:EtOAc = 20:1);  $^1\text{H}$  NMR ( $\text{CDCl}_3$ , 400 MHz),  $\delta$  7.97 (s, 1H), 7.92–7.82 (m, 3H), 7.74 (dd,  $J = 8.4, 1.6$  Hz, 1H), 7.56–7.46 (m, 2H), 7.44 (d,  $J = 8.0$  Hz, 2H), 7.32–7.24 (m, 2H), 7.05 (t,  $J = 7.2$  Hz, 1H), 5.56 (dd,  $J = 9.6, 6.0$  Hz, 1H), 4.26 (q,  $J = 7.2$  Hz, 2H), 4.10–4.00 (m, 1H), 3.99–3.90 (m, 1H), 3.35–3.20 (m, 2H), 1.21 (t,  $J = 7.2$  Hz, 3H), 1.04 (t,  $J = 7.2$  Hz, 3H) ppm.

**Diethyl 5-butyl-2-phenylisoxazolidine-3,3-dicarboxylate (4aam)** <sup>lit 1</sup>

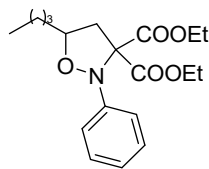

yellow oil, yield: 71%; TLC,  $R_f = 0.3$  (PE:EtOAc = 20:1);  $^1\text{H}$  NMR ( $\text{CDCl}_3$ , 400 MHz),  $\delta$  7.31–7.25 (m, 2H), 7.22 (t,  $J = 7.2$  Hz, 2H), 6.99 (t,  $J = 7.2$  Hz, 1H), 4.36–4.27 (m, 1H), 4.18 (q,  $J = 7.2$  Hz, 2H), 4.08–4.02 (m, 1H), 3.99–3.90 (m, 1H), 2.99 (dd,  $J = 12.4, 6.0$  Hz, 1H), 2.74 (dd,  $J = 12.4, 9.2$  Hz, 1H), 1.88–1.76 (m, 1H), 1.72–1.61 (m, 1H), 1.55–1.45 (m, 1H), 1.44–1.35 (m, 3H), 1.15 (t,  $J = 7.2$  Hz, 3H), 1.04 (t,  $J = 7.2$  Hz, 3H), 0.93 (t,  $J = 7.2$  Hz, 3H) ppm.

**Diethyl 5-(3-hydroxypropyl)-2-phenylisoxazolidine-3,3-dicarboxylate (4aan)** <sup>lit 1</sup>

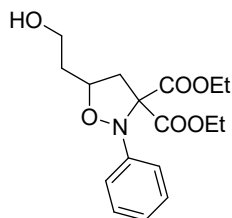

yellow oil, yield: 75%; TLC,  $R_f = 0.3$  (PE:EtOAc = 5:1);  $^1\text{H}$  NMR ( $\text{CDCl}_3$ , 400 MHz),  $\delta$  7.35–7.20 (m, 4H), 7.07–6.99 (m, 1H), 4.58–4.48 (m, 1H), 4.18–4.09 (m, 2H), 4.08–4.01 (m, 1H), 4.00–3.92 (m, 1H), 3.91 (dd,  $J = 7.2, 6.4$  Hz, 2H), 3.08 (q,  $J = 6.4$  Hz, 1H), 2.87 (q,  $J = 8.8$  Hz, 1H), 2.12–1.94 (m, 2H), 1.89 (t,  $J = 5.2$  Hz, 1H), 1.11 (t,  $J = 7.2$  Hz, 3H), 1.05 (t,  $J = 7.2$  Hz, 3H) ppm.

**Diethyl 5-((methylthio)methyl)-2-phenylisoxazolidine-3,3-dicarboxylate (4aao)** <sup>lit 1</sup>

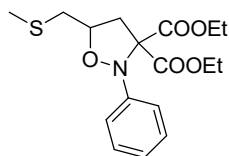

yellow oil, yield: 73%; TLC,  $R_f = 0.3$  (PE:EtOAc = 20:1);  $^1\text{H}$  NMR ( $\text{CDCl}_3$ , 400 MHz),  $\delta$  7.38 (d,  $J = 8.8$  Hz, 2H), 7.28 (s, 1H), 7.2 (d,  $J = 8.8$  Hz, 2H), 4.61–4.48 (m, 1H), 4.20–4.01 (m, 4H), 3.14 (q,  $J = 6.4$  Hz, 1H), 2.96–2.80 (m, 2H), 2.79–2.72 (m, 1H), 2.26–2.19 (s, 3H), 1.16 (q,  $J = 7.2$  Hz, 6H) ppm.

**3,3-diethyl 5-methyl 2-phenylisoxazolidine-3,3,5-tricarboxylate (4aap)** <sup>lit 1</sup>

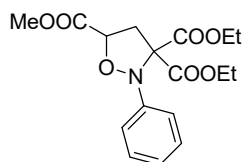

yellow oil, yield: 81%; TLC,  $R_f = 0.3$  (PE:EtOAc = 20:1);  $^1\text{H}$  NMR ( $\text{CDCl}_3$ , 400 MHz),  $\delta$  7.43 (d,  $J = 8.8$  Hz, 2H), 7.29–7.20 (m, 2H), 7.08 (t,  $J = 7.2$  Hz, 1H), 4.91 (dd,  $J = 8.0, 5.6$  Hz, 1H), 4.24–4.13 (m, 2H), 4.05–3.93 (m, 1H), 3.92–3.83 (m, 1H), 3.82 (s, 3H), 3.38–3.23 (m, 2H), 1.19 (t,  $J = 7.2$  Hz, 3H), 0.96 (t,  $J = 7.2$  Hz, 3H) ppm.

**3-ethyl 4,5-dimethyl 2-phenylisoxazolidine-3,4,5-tricarboxylate (4aaq)** <sup>lit 1</sup>

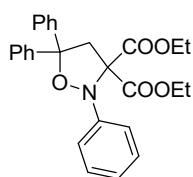

yellow oil, yield: 75%; TLC,  $R_f = 0.3$  (PE:EtOAc = 20:1);  $^1\text{H}$  NMR ( $\text{CDCl}_3$ , 400 MHz),  $\delta$  7.53 (d,  $J = 7.2$  Hz, 4H), 7.32 (t,  $J = 7.6$  Hz, 6H), 7.28–7.2 (m, 4H), 7.00 (t,  $J = 7.2$  Hz, 1H), 3.99–3.84 (m, 4H), 3.82 (s, 2H), 0.96 (t,  $J = 7.2$  Hz, 6H) ppm.

**3,3-diethyl 5-methyl 5-methyl-2-phenylisoxazolidine-3,3,5-tricarboxylate (4aar)** <sup>lit 1</sup>



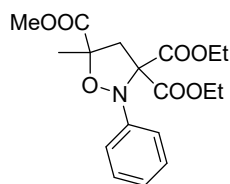

yellow oil, yield: 70%; TLC,  $R_f = 0.3$  (PE:EtOAc = 20:1);  $^1\text{H}$  NMR ( $\text{CDCl}_3$ , 400 MHz),  $\delta$  7.39–7.33 (m, 2H), 7.27–7.20 (m, 2H), 7.07–7.02 (m, 1H), 4.31 (q,  $J = 7.2$  Hz, 2H), 3.93–3.83 (m, 1H), 3.81–3.75 (s, 3H), 3.75–3.68 (m, 1H), 3.55 (d,  $J = 12.8$  Hz, 1H), 3.05 (d,  $J = 12.8$  Hz, 1H), 1.71 (s, 3H), 1.26 (q,  $J = 7.2$  Hz, 3H), 0.86 (q,  $J = 7.2$  Hz, 3H) ppm.

**Diethyl 5-methyl-2,5-diphenylisoxazolidine-3,3-dicarboxylate (4aas)** <sup>lit 1</sup>

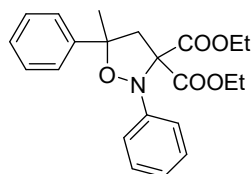

yellow oil, yield: 73%; TLC,  $R_f = 0.3$  (PE:EtOAc = 20:1);  $^1\text{H}$  NMR ( $\text{CDCl}_3$ , 600 MHz),  $\delta$  7.48 (d,  $J = 7.2$  Hz, 2H), 7.34–7.31 (m, 4H), 7.26–7.22 (m, 3H), 7.00 (t,  $J = 7.2$  Hz, 1H), 4.06–4.00 (m, 2H), 3.94–3.86 (m, 2H), 3.45 (d,  $J = 12.6$  Hz, 1H), 3.15 (d,  $J = 12.6$  Hz, 1H), 1.74 (s, 3H), 1.04 (t,  $J = 7.2$  Hz, 3H), 0.95 (t,  $J = 7.2$  Hz, 3H) ppm.

**Diethyl 5-formyl-5-methyl-2-phenylisoxazolidine-3,3-dicarboxylate (4aat)** <sup>lit 1</sup>

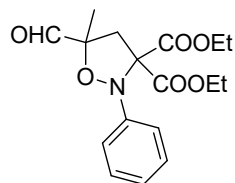

colourless oil, yield: 62%; TLC,  $R_f = 0.3$  (PE:EtOAc = 20:1);  $^1\text{H}$  NMR ( $\text{CDCl}_3$ , 400 MHz),  $\delta$  9.71 (d,  $J = 0.4$  Hz, 1H), 7.42 (dd,  $J = 8.8, 1.2$  Hz, 2H), 7.30–7.24 (m, 3H), 7.10 (t,  $J = 7.2$  Hz, 1H), 4.33–4.21 (m, 2H), 3.93–3.82 (m, 1H), 3.76–3.64 (m, 1H), 3.20 (d,  $J = 12.8$  Hz, 1H), 3.05 (dd,  $J = 12.8, 0.8$  Hz, 1H), 1.52 (s, 3H), 1.27 (t,  $J = 7.2$  Hz, 3H), 0.83 (t,  $J = 7.2$  Hz, 3H) ppm.

**(4*S*,5*R*)-3,3-diethyl 4,5-dimethyl 2-phenylisoxazolidine-3,3,4,5-tetracarboxylate (4aau)** <sup>lit 1</sup>

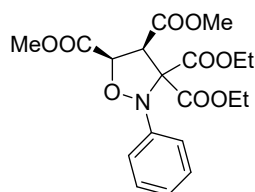

yellow oil, yield: 90%; TLC,  $R_f = 0.3$  (PE:EtOAc = 5:1);  $^1\text{H}$  NMR ( $\text{CDCl}_3$ , 600 MHz),  $\delta$  7.41 (d,  $J = 7.8$  Hz, 2H), 7.26 (t,  $J = 7.8$  Hz, 2H), 7.09 (t,  $J = 7.2$  Hz, 1H), 5.24 (d,  $J = 7.8$  Hz, 1H), 4.56 (d,  $J = 7.8$  Hz, 1H), 4.21 (q,  $J = 7.2$  Hz, 2H), 4.01–3.96 (m, 1H), 3.84–3.81 (m, 1H), 3.80 (s, 3H), 3.73 (s, 3H), 1.21 (t,  $J = 7.2$  Hz, 3H), 0.94 (t,  $J = 7.2$  Hz, 3H) ppm.

**(4S, 5S)-3,3-diethyl-4,5-dimethyl-2-phenylisoxazolidine-3,3,4,5-tetracarboxylate (4aav)** <sup>lit 1</sup>

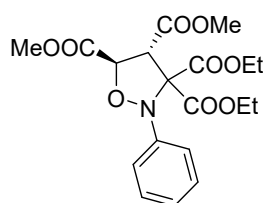

yellow oil, yield: 63%; TLC,  $R_f = 0.3$  (PE:EtOAc = 5:1);  $^1\text{H}$  NMR ( $\text{CDCl}_3$ , 600 MHz),  $\delta$  7.30 (d,  $J = 7.8$  Hz, 2H), 7.25 (t,  $J = 7.8$  Hz, 2H), 7.08 (t,  $J = 7.2$  Hz, 1H), 5.16 (d,  $J = 6.6$  Hz, 1H), 4.59 (d,  $J = 6.0$  Hz, 1H), 4.23–4.17 (m, 1H), 4.12–4.07 (m, 1H), 4.02 (q,  $J = 7.2$  Hz, 2H), 3.83 (s, 3H), 3.76 (s, 3H), 1.14 (t,  $J = 7.2$  Hz, 3H), 1.02 (t,  $J = 7.2$  Hz, 3H) ppm.

**Diethyl 4-benzoyl-2,5-diphenylisoxazolidine-3,3-dicarboxylate (4aaw)** <sup>lit 1</sup>

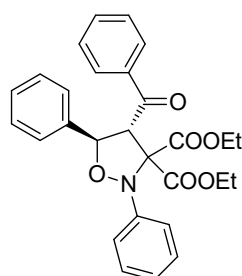

white solid (mp: 144–145 °C), yield: 61%; TLC,  $R_f = 0.3$  (PE:EtOAc = 20:1);  $^1\text{H}$  NMR ( $\text{CDCl}_3$ , 400 MHz),  $\delta$  7.83 (d,  $J = 7.2$  Hz, 2H), 7.61–7.45 (m, 5H), 7.40–7.27 (m, 7H), 7.14 (t,  $J = 7.2$  Hz, 1H), 5.56 (s, 2H), 4.15–4.05 (m, 1H), 3.97–3.85 (m, 2H), 3.63–3.53 (m, 1H), 0.88 (t,  $J = 7.2$  Hz, 3H), 0.79 (t,  $J = 7.2$  Hz, 3H) ppm.

**Triethyl 2,5-diphenylisoxazolidine-3,3,4-tricarboxylate (4aax)** <sup>lit 1</sup>

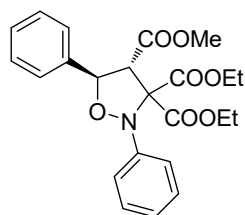

yellow oil, yield: 75%; TLC,  $R_f = 0.3$  (PE:EtOAc = 20:1);  $^1\text{H}$  NMR ( $\text{CDCl}_3$ , 400 MHz),  $\delta$  7.61 (dd,  $J = 8.0, 2.0$  Hz, 2H), 7.47–7.36 (m, 5H), 7.30–7.24 (m, 2H), 7.09 (t,  $J = 7.2$  Hz, 1H), 5.47 (d,  $J = 9.2$  Hz, 1H), 4.56 (d,  $J = 9.2$  Hz, 1H), 4.33–4.22 (m, 1H), 4.21–4.10 (m, 1H), 4.05–3.95 (m, 1H), 3.82–3.72 (m, 1H), 3.70 (s, 3H), 1.21 (t,  $J = 7.2$  Hz, 3H), 0.94 (t,  $J = 7.2$  Hz, 3H) ppm.

**Diethyl 2-phenyltetrahydrofuro[2,3-*d*]isoxazole-3,3(2*H*)-dicarboxylate (4aay)** <sup>lit 1</sup>

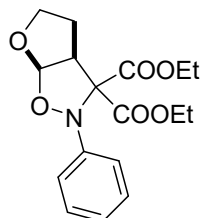

colourless oil, yield: 65%; TLC,  $R_f = 0.3$  (PE:EtOAc = 20:1);  $^1\text{H}$  NMR ( $\text{CDCl}_3$ , 600 MHz),  $\delta$  7.46 (d,  $J = 8.0$  Hz, 2H), 7.25 (d,  $J = 8.0$  Hz, 2H), 7.10 (t,  $J = 7.2$  Hz, 1H), 6.00 (d,  $J = 5.6$  Hz, 1H), 4.40–4.31 (m, 1H), 4.30–4.19 (m, 2H), 4.04–3.97 (m, 1H), 3.95–3.84 (m, 2H), 2.17–2.05 (m, 1H), 1.97–1.89 (m, 1H), 1.29 (t,  $J = 7.2$  Hz, 3H), 0.78 (t,  $J = 7.2$  Hz, 3H) ppm.

**Diethyl 5-phenyl-2-(*o*-tolyl)isoxazolidine-3,3-dicarboxylate (4baa)** <sup>lit 1</sup>

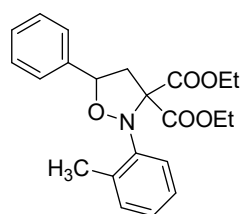

yellow oil, yield: 94%; TLC,  $R_f = 0.3$  (PE:EtOAc = 20:1);  $^1\text{H}$  NMR ( $\text{CDCl}_3$ , 400 MHz),  $\delta$  7.49 (t,  $J = 7.2$  Hz, 3H), 7.46 (s, 1H), 7.42–7.31 (m, 4H), 7.09 (dd,  $J = 8.4, 1.6$  Hz, 1H), 5.43 (dd,  $J = 9.2, 6.4$  Hz, 1H), 4.28–4.17 (m, 2H), 4.08–3.97 (m, 1H), 3.91–3.80 (m, 1H), 2.29–3.16 (m, 2H), 2.32 (s, 3H), 1.23 (t,  $J = 7.2$  Hz, 3H), 1.06 (t,  $J = 7.2$  Hz, 3H) ppm.

**Diethyl 5-phenyl-2-(*m*-tolyl)isoxazolidine-3,3-dicarboxylate (4caa)** <sup>lit 1</sup>

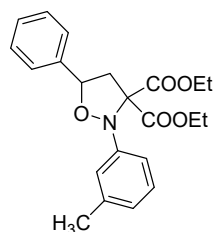

yellow oil, yield: 98%; TLC,  $R_f = 0.3$  (PE:EtOAc = 20:1);  $^1\text{H}$  NMR ( $\text{CDCl}_3$ , 600 MHz),  $\delta$  7.55 (d,  $J = 7.2$  Hz, 2H), 7.40 (t,  $J = 7.2$  Hz, 2H), 7.35 (t,  $J = 7.2$  Hz, 1H), 7.19–7.12 (m, 3H), 6.85 (d,  $J = 7.2$  Hz, 1H), 5.34 (dd,  $J = 9.6, 6.0$  Hz, 1H), 4.23–4.18 (m, 2H), 4.07–4.02 (m, 1H), 3.98–3.93 (m, 1H), 3.23 (dd,  $J = 13.2, 6.6$  Hz, 1H), 3.14 (dd,  $J = 13.2, 9.0$  Hz, 1H), 2.30 (s, 3H), 1.20 (t,  $J = 7.2$  Hz, 3H), 1.04 (t,  $J = 7.2$  Hz, 3H) ppm.

**Diethyl 5-phenyl-2-(*p*-tolyl)isoxazolidine-3,3-dicarboxylate (4daa)** <sup>lit 1</sup>

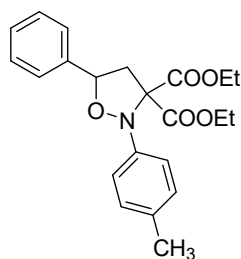

yellow oil, yield: 95%; TLC,  $R_f = 0.3$  (PE:EtOAc = 20:1);  $^1\text{H}$  NMR ( $\text{CDCl}_3$ , 600 MHz),  $\delta$  7.55 (d,  $J = 7.2$  Hz, 2H), 7.39 (t,  $J = 7.8$  Hz, 2H), 7.35 (t,  $J = 7.2$  Hz, 1H), 7.29 (d,  $J = 8.4$  Hz, 2H), 7.06 (d,  $J = 8.4$  Hz, 2H), 5.32 (dd,  $J = 9.6, 6.6$  Hz, 1H), 4.23–4.18 (m, 2H), 4.04–3.98 (m, 1H), 3.94–3.89 (m, 1H), 3.21 (dd,  $J = 13.2, 6.6$  Hz, 1H), 3.15 (dd,  $J = 13.2, 9.6$  Hz, 1H), 2.28 (s, 3H), 1.21 (t,  $J = 7.2$  Hz, 3H), 1.02 (t,  $J = 7.2$  Hz, 3H) ppm.

**Diethyl 2-(2,4-dimethylphenyl)-5-phenylisoxazolidine-3,3-dicarboxylate (4eaa)** <sup>lit 1</sup>

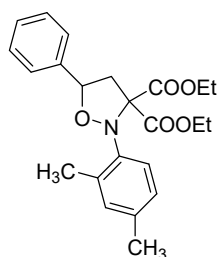

yellow oil, yield: 71%; TLC,  $R_f = 0.3$  (PE:EtOAc = 20:1);  $^1\text{H}$  NMR ( $\text{CDCl}_3$ , 600 MHz),  $\delta$  7.49 (d,  $J = 7.2$  Hz, 2H), 7.37 (t,  $J = 7.2$  Hz, 2H),

7.33–7.31 (m, 2H), 6.95 (s, 1H), 6.93 (d,  $J = 8.4$  Hz, 1H), 5.32 (t,  $J = 7.8$  Hz, 1H), 4.20–4.12 (m, 2H), 4.00–3.95 (m, 1H), 3.82–3.76 (m, 1H), 3.23 (d,  $J = 7.8$  Hz, 2H), 2.43 (s, 3H), 2.26 (s, 3H), 1.17 (t,  $J = 7.2$  Hz, 3H), 1.01 (t,  $J = 7.2$  Hz, 3H) ppm.

**Diethyl 2-(2-chlorophenyl)-5-phenylisoxazolidine-3,3-dicarboxylate (4faa)** <sup>lit 1</sup>

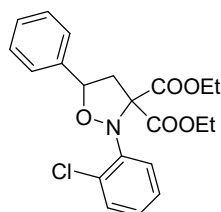

yellow oil, yield: 75%; TLC,  $R_f = 0.3$  (PE:EtOAc = 20:1);  $^1\text{H}$  NMR ( $\text{CDCl}_3$ , 600 MHz),  $\delta$  7.62 (d,  $J = 8.4$  Hz, 1H), 7.51 (d,  $J = 7.2$  Hz, 2H), 7.39 (t,  $J = 7.2$  Hz, 2H), 7.35 (t,  $J = 9.6$  Hz, 2H), 7.22 (t,  $J = 7.8$  Hz, 1H), 7.11 (t,  $J = 7.8$  Hz, 1H), 5.43 (dd,  $J = 9.6, 5.4$  Hz, 1H), 4.24–4.19 (m, 2H), 4.05–3.99 (m, 1H), 3.87–3.81 (m, 1H), 3.26 (dd,  $J = 12.6, 10.2$  Hz, 1H), 3.18 (dd,  $J = 13.2, 6.0$  Hz, 1H), 1.23 (t,  $J = 7.2$  Hz, 3H), 1.05 (t,  $J = 7.2$  Hz, 3H) ppm.

**Diethyl 2-(3-chlorophenyl)-5-phenylisoxazolidine-3,3-dicarboxylate (4gaa)** <sup>lit 1</sup>

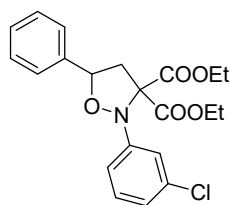

yellow oil, yield: 83%; TLC,  $R_f = 0.3$  (PE:EtOAc = 20:1);  $^1\text{H}$  NMR ( $\text{CDCl}_3$ , 400 MHz),  $\delta$  7.53 (d,  $J = 8.4$  Hz, 2H), 7.48 (d,  $J = 2.4$  Hz, 2H), 7.45–7.42 (m, 1H), 7.41 (s, 1H), 7.40–7.35 (m, 2H), 7.13 (dd,  $J = 8.8, 2.4$  Hz, 1H), 5.35 (dd,  $J = 9.6, 6.0$  Hz, 1H), 4.28 (q,  $J = 7.2$  Hz, 2H), 4.18–4.03 (m, 2H), 3.30 (dd,  $J = 12.8, 6.0$  Hz, 1H), 3.16 (dd,  $J = 12.8, 9.6$  Hz, 1H), 1.24 (t,  $J = 7.2$  Hz, 3H), 1.11 (t,  $J = 7.2$  Hz, 3H) ppm.

**Diethyl 2-(4-chlorophenyl)-5-phenylisoxazolidine-3,3-dicarboxylate (4haa)** <sup>lit 1</sup>

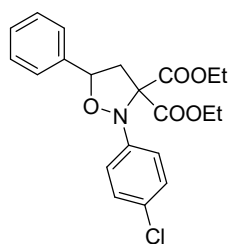

yellow oil, yield: 87%; TLC,  $R_f = 0.3$  (PE:EtOAc = 20:1);  $^1\text{H}$  NMR ( $\text{CDCl}_3$ , 600 MHz),  $\delta$  7.53 (d,  $J = 7.2$  Hz, 2H), 7.40 (t,  $J = 7.8$  Hz, 2H), 7.37–7.31 (m, 3H), 7.22 (d,  $J = 9$  Hz, 2H), 5.32 (dd,  $J = 9.6, 6.0$  Hz, 1H), 4.22 (q,  $J = 7.2$  Hz, 2H), 4.08–4.02 (m, 1H), 4.01–3.95 (m, 1H), 3.25 (dd,  $J = 12.6, 6.6$  Hz, 1H), 3.15 (dd,  $J = 13.2, 9.6$  Hz, 1H), 1.22 (t,  $J = 7.2$  Hz, 3H), 1.06 (t,  $J = 7.2$  Hz, 3H) ppm.

**Diethyl 2-(3,5-dichlorophenyl)-5-phenylisoxazolidine-3,3-dicarboxylate (4iaa)** <sup>lit 1</sup>

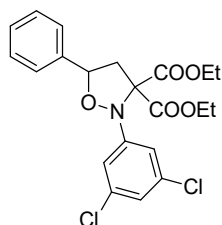

yellow oil, yield: 74%; TLC,  $R_f = 0.3$  (PE:EtOAc = 20:1);  $^1\text{H}$  NMR ( $\text{CDCl}_3$ , 400 MHz),  $\delta$  7.52 (d,  $J = 6.8$  Hz, 2H), 7.45–7.36 (m, 2H), 7.23 (d,  $J = 1.6$  Hz, 2H), 6.98 (t,  $J = 1.6$  Hz, 1H), 6.81–6.76 (m, 1H), 5.36 (dd,  $J = 9.6, 6.0$  Hz, 1H), 4.31 (q,  $J = 7.2$  Hz, 2H), 4.19–4.07 (m, 2H), 3.32 (dd,  $J = 12.8, 5.6$  Hz, 1H), 3.15 (dd,  $J = 12.8, 9.6$  Hz, 1H), 1.26 (t,  $J = 7.2$  Hz, 3H), 1.15 (t,  $J = 7.2$  Hz, 3H) ppm.

**Dimethyl 2,5-diphenylisoxazolidine-3,3-dicarboxylate (4aba)** <sup>lit 1</sup>

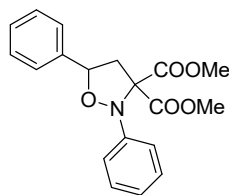

white solid, mp: 68–71 °C, yield: 97%; TLC,  $R_f = 0.3$  (PE:EtOAc = 20:1);  $^1\text{H}$  NMR ( $\text{CDCl}_3$ , 600 MHz),  $\delta$  7.58 (dd,  $J = 8.4, 1.6$  Hz, 2H), 7.44–7.37 (m, 3H), 7.36–7.32 (m, 2H), 7.30–7.23 (m, 2H), 7.05 (t,  $J = 7.2$  Hz, 1H), 5.38 (dd,  $J = 9.6, 6.0$  Hz, 1H), 3.75 (s, 3H), 3.54 (s, 3H), 3.29 (dd,  $J = 12.8, 6.4$  Hz, 1H), 3.19 (dd,  $J = 12.8, 9.6$  Hz, 1H) ppm.

**Diisopropyl 2,5-diphenylisoxazolidine-3,3-dicarboxylate (4aca)** <sup>lit 1</sup>

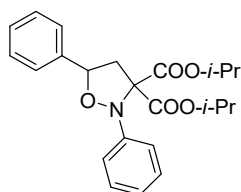

Yellow oil, yield: 94%; TLC,  $R_f = 0.3$  (PE:EtOAc = 20:1);  $^1\text{H}$  NMR (400 MHz,  $\text{CDCl}_3$ )  $\delta$  7.59 (d,  $J = 7.2$  Hz, 2H), 7.45–7.32 (m, 5H), 7.28–7.20 (m, 2H), 7.06–6.95 (m, 1H), 5.37 (dd,  $J = 9.2, 6.4$  Hz, 1H), 5.12–5.01 (m, 1H), 4.90–4.80 (m, 1H), 3.25–3.10 (m, 2H), 1.22 (q,  $J = 3.2$  Hz, 6H), 1.10 (d,  $J = 6.4$  Hz, 3H), 0.97 (d,  $J = 6.4$  Hz, 3H) ppm.

#### Di-*tert*-butyl 2,5-diphenylisoxazolidine-3,3-dicarboxylate (4ada) <sup>lit 1</sup>

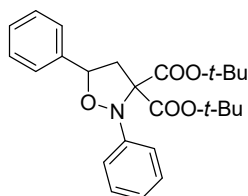

white solid, mp: 76–80 °C, yield: 94%; TLC,  $R_f = 0.3$  (PE:EtOAc = 20:1);  $^1\text{H}$  NMR ( $\text{CDCl}_3$ , 400 MHz),  $\delta$  7.58 (d,  $J = 6.8$  Hz, 2H), 7.45–7.36 (m, 5H), 7.29 (dd,  $J = 7.2, 2.8$  Hz, 2H), 7.02 (t,  $J = 7.2$  Hz, 1H), 6.36 (dd,  $J = 9.6, 6.8$  Hz, 1H), 3.19–3.06 (m, 2H), 1.43 (s, 9 H), 1.26 (s, 9H) ppm.

#### 4. Characterization data for the the intermediate 5a

##### 1,3-diethoxy-1,3-dioxo-*N*-phenylpropan-2-imine oxide

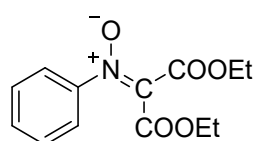

Yellow oil, yield: 90%; column chromatography eluent, petroleum ether/EtOAc = 10:1;  $^1\text{H}$  NMR (600 MHz,  $\text{CDCl}_3$ )  $\delta$  7.50 (t,  $J = 6.6$  Hz, 1H), 7.45 (t,  $J = 7.8$  Hz, 2H), 7.40 (d,  $J = 8.4$  Hz, 2H), 4.44 (q,  $J = 7.2$  Hz, 2H), 4.11 (q,  $J = 7.2$  Hz, 2H), 1.39 (t,  $J = 7.2$  Hz, 3H), 1.11 (t,  $J = 7.2$  Hz, 3H) ppm;  $^{13}\text{C}\{^1\text{H}\}$  NMR (150MHz,  $\text{CDCl}_3$ )  $\delta$  159.3, 157.7, 146.2, 130.0, 128.1, 122.0, 61.7, 61.4, 13.0, 12.7 ppm; HRMS (ESI)  $m/z$ :  $[\text{M} + \text{Na}]^+$  calcd for  $\text{C}_{13}\text{H}_{15}\text{NNaO}_5^+$ , 288.0842; found, 288.0848.

## 5. References

1) Li, X.; Zheng, L.; Gong, X.; Chang, H.; Gao, W.; Wei, W. *J. Org. Chem.* **2021**, *86*, 1096.

## 6. <sup>1</sup>H NMR and <sup>13</sup>C NMR spectra for the intermediate 5a

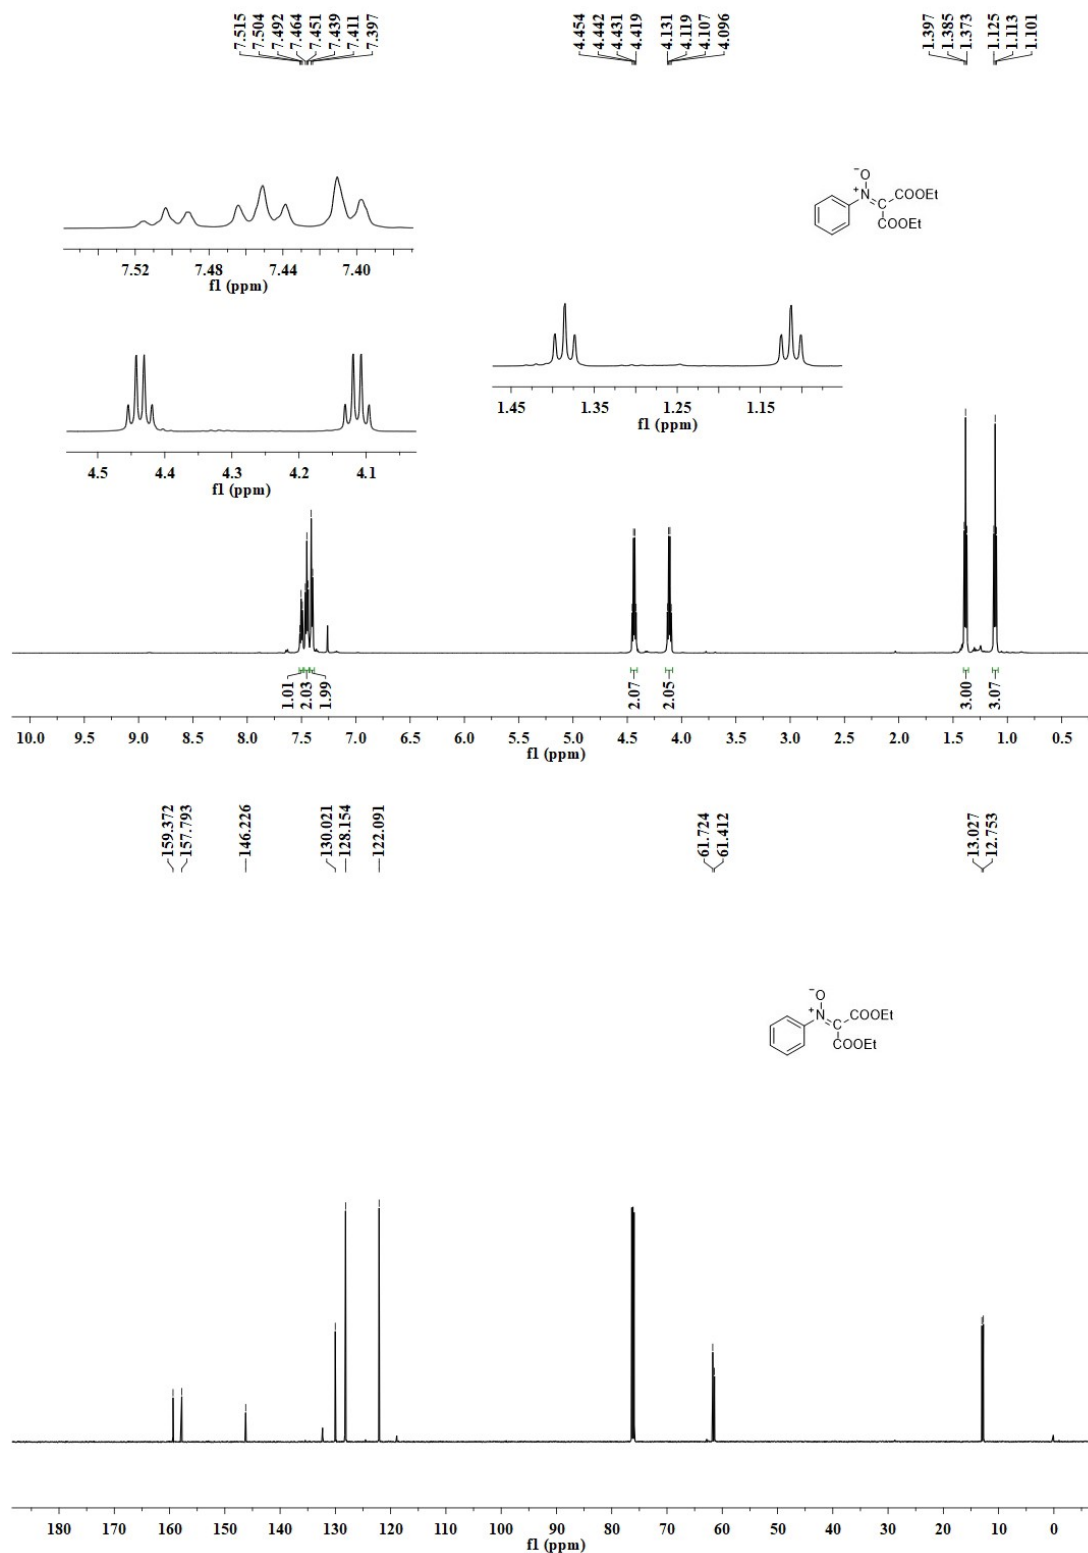



## 7. <sup>1</sup>H NMR and <sup>13</sup>C NMR spectra and NOESY for products 4

### 4aaa

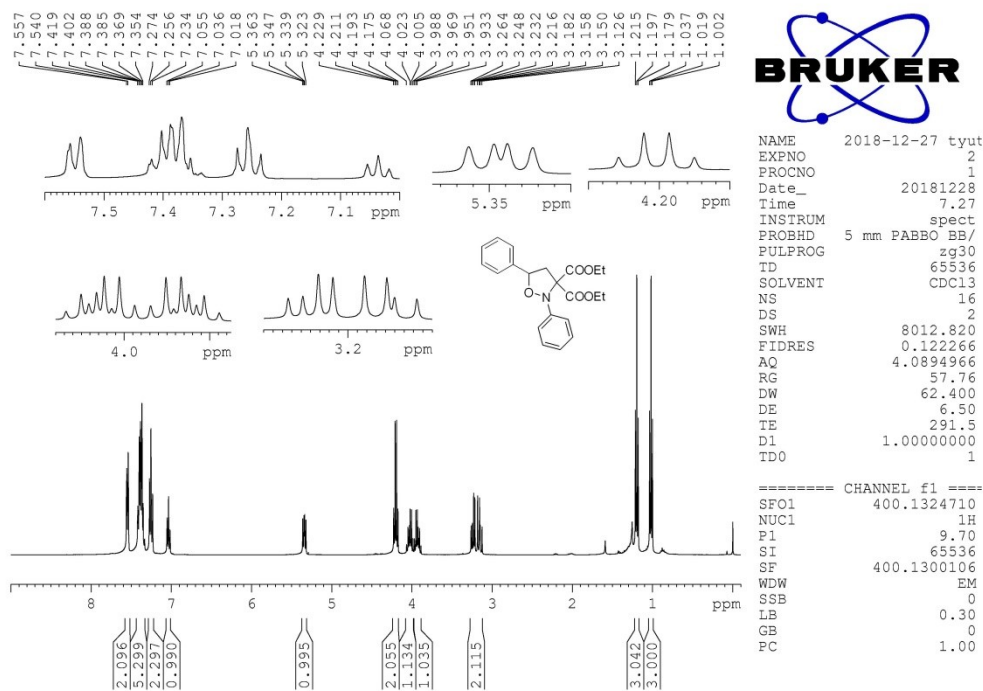

### 4aab

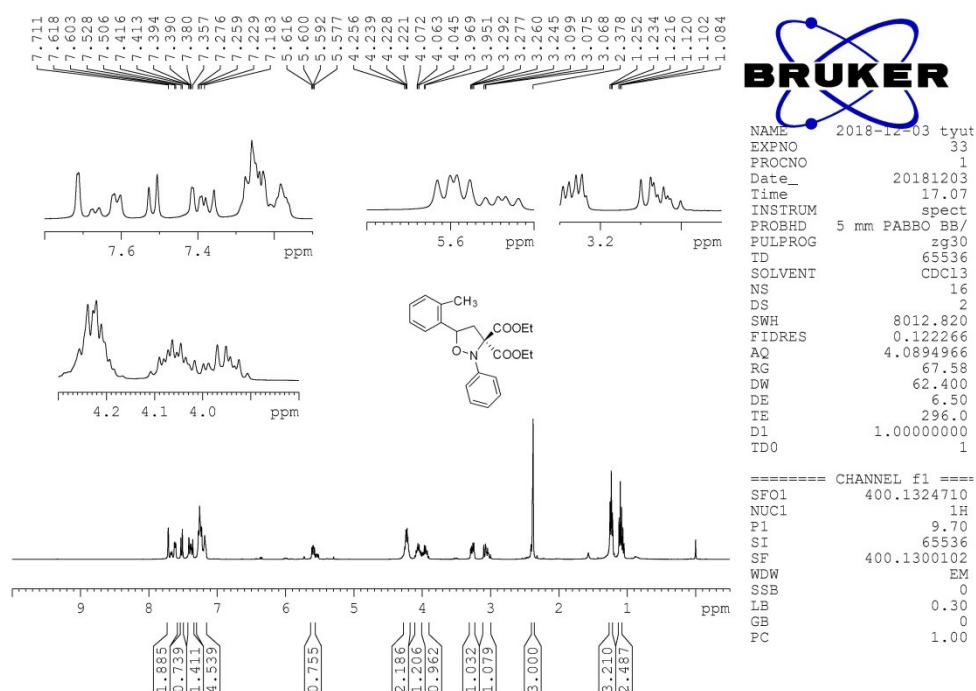

### 4aac

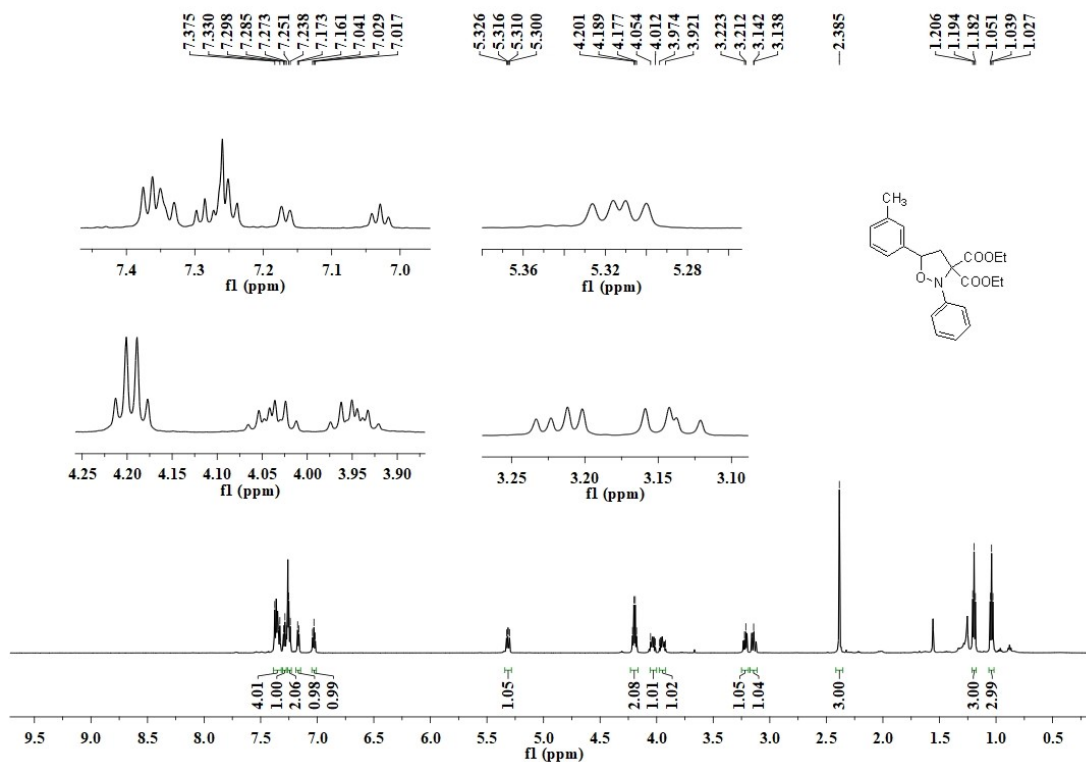

### 4aad

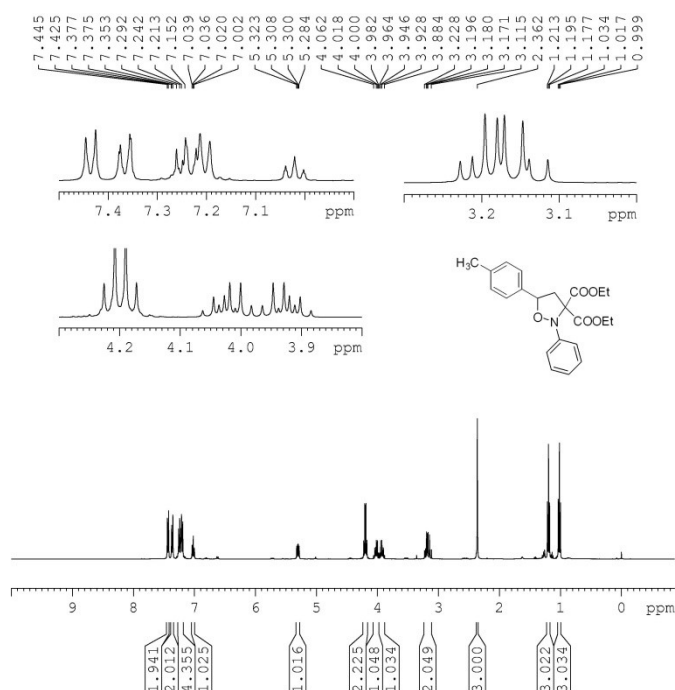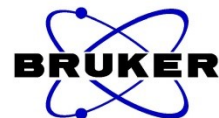

```

NAME      2018-10-28 tyut-1
EXPNO    4
PROCNO   1
Date_    20181026
Time     17.51
INSTRUM  spect
PROBHD   5 mm PABBO BB/
PULPROG  zg30
TD       65536
SOLVENT  CDC13
NS       16
DS       2
SWH      8012.820 Hz
FIDRES   0.122266 Hz
AQ       4.0894966 se
RG       34.32
DW       62.400 us
DE       6.50 us
TE       296.4 K
D1       1.00000000 se
TD0      1

===== CHANNEL f1 =====
SFO1     400.1324710 MH
NUC1     1H
P1       9.70 us
SI       65536
SF       400.1300145 MH
WDW      EM
SSB      0
LB       0.30 Hz
GB       0
PC       1.00
    
```

4aae

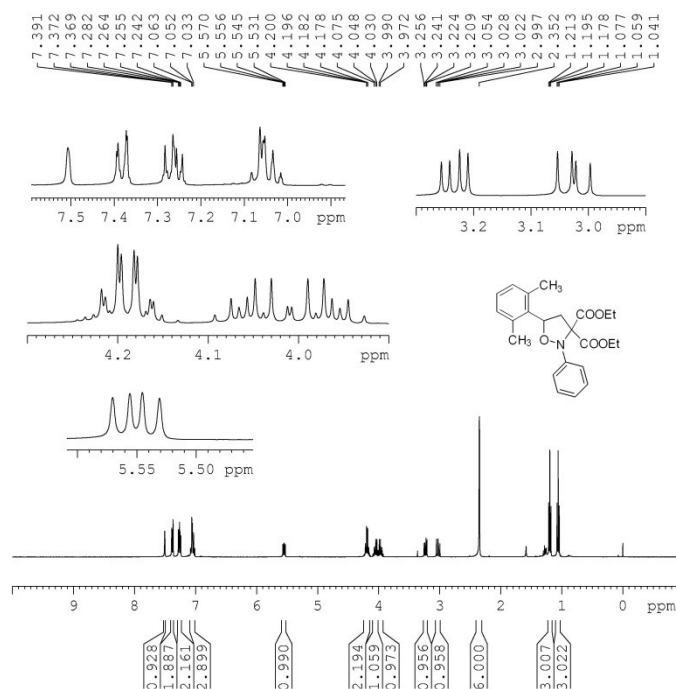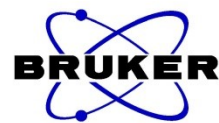

NAME 2018-10-12 tyut-1  
 EXPNO 1  
 PROCNO 1  
 Date\_ 20181012  
 Time 14.50  
 INSTRUM spect  
 PROBHD 5 mm PABBO BB/  
 PULPROG zg30  
 TD 65536  
 SOLVENT CDC13  
 NS 16  
 DS 2  
 SWH 8012.820 Hz  
 FIDRES 0.122266 Hz  
 AQ 4.0894966 se  
 RG 54.19  
 DW 62.400 us  
 DE 6.50 us  
 TE 295.2 K  
 D1 1.00000000 se  
 TD0 1

===== CHANNEL f1 =====  
 SFO1 400.1324710 MH  
 NUC1 1H  
 P1 9.70 us  
 SI 65536  
 SF 400.1300116 MH  
 WDW EM  
 SSB 0  
 LB 0.30 Hz  
 GB 0  
 PC 1.00

4aaf

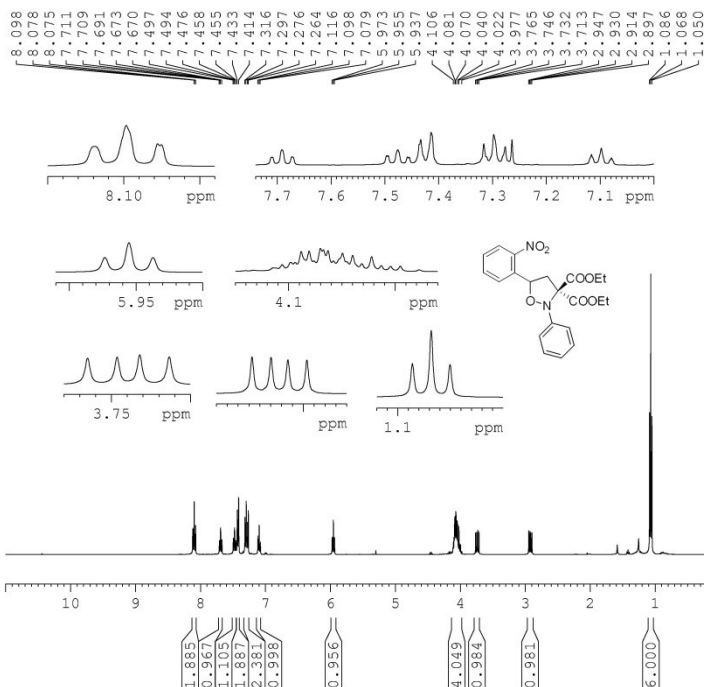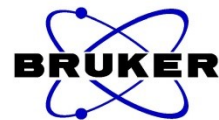

NAME 2018-12-17 tyut  
 EXPNO 35  
 PROCNO 1  
 Date\_ 20181218  
 Time 7.11  
 INSTRUM spect  
 PROBHD 5 mm PABBO BB/  
 PULPROG zg30  
 TD 65536  
 SOLVENT CDC13  
 NS 16  
 DS 2  
 SWH 8012.820  
 FIDRES 0.122266  
 AQ 4.0894966  
 RG 60.71  
 DW 62.400  
 DE 6.50  
 TE 293.3  
 D1 1.00000000  
 TD0 1

===== CHANNEL f1 =====  
 SFO1 400.1324710  
 NUC1 1H  
 P1 9.70  
 SI 65536  
 SF 400.1300085  
 WDW EM  
 SSB 0  
 LB 0.30  
 GB 0  
 PC 1.00

4aag

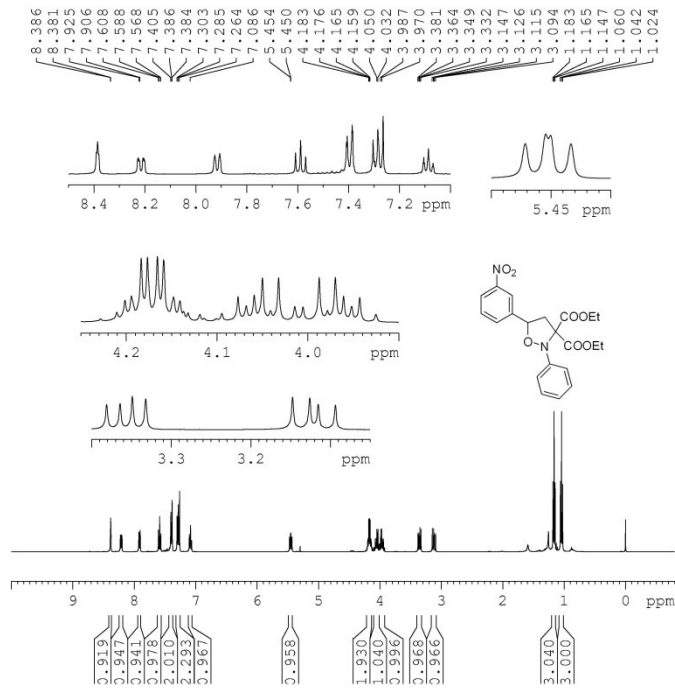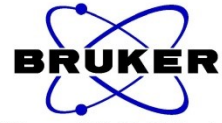

NAME 2018-11-06 tyut-1  
 EXPNO 9  
 PROCNO 1  
 Date\_ 20181106  
 Time 22.54  
 INSTRUM spect  
 PROBHD 5 mm PABBO BB/  
 PULPROG zg30  
 TD 65536  
 SOLVENT CDC13  
 NS 16  
 DS 2  
 SWH 8012.820 Hz  
 FIDRES 0.122266 Hz  
 AQ 4.0894966 se  
 RG 67.58  
 DW 62.400 us  
 DE 6.50 us  
 TE 295.5 K  
 D1 1.00000000 se  
 TD0 1

===== CHANNEL f1 =====  
 SFO1 400.1324710 MH  
 NUC1 1H  
 P1 9.70 us  
 SI 65536  
 SF 400.1300082 MH  
 WDW EM  
 SSB 0  
 LB 0.30 Hz  
 GB 0  
 PC 1.00

4aah

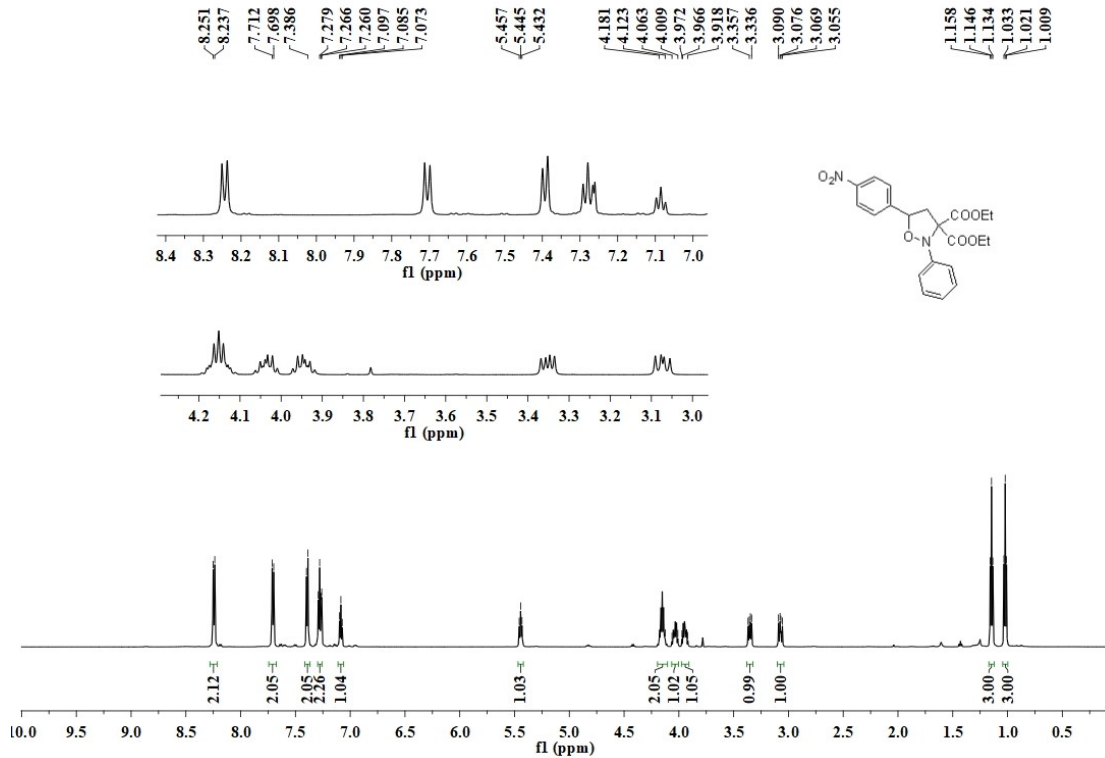

4aai

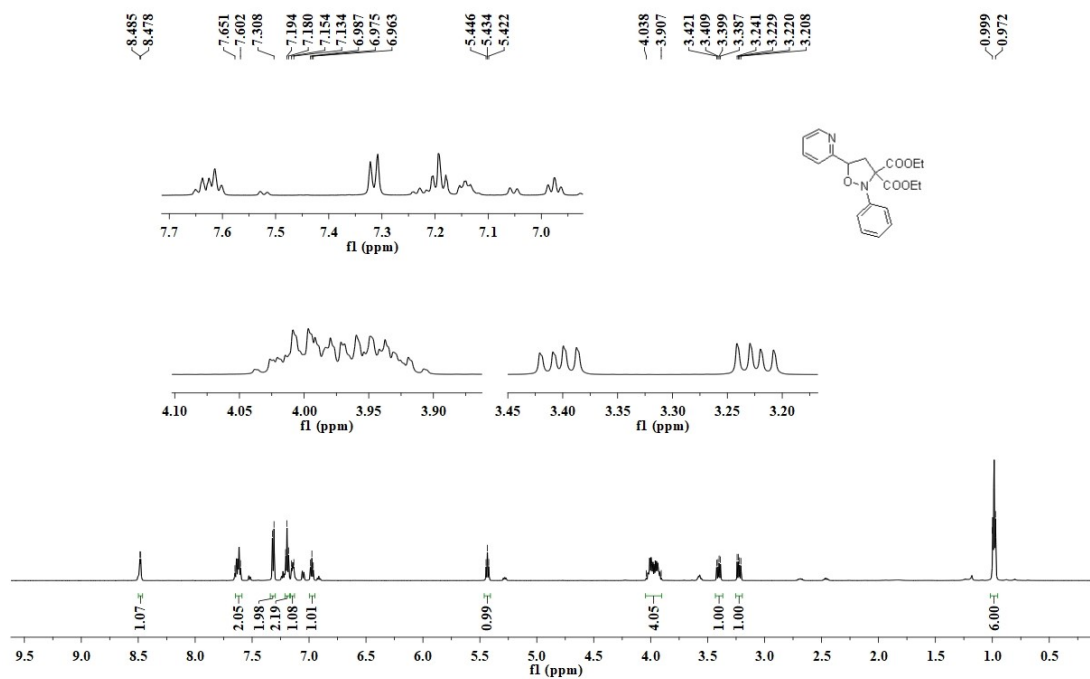

4aaj

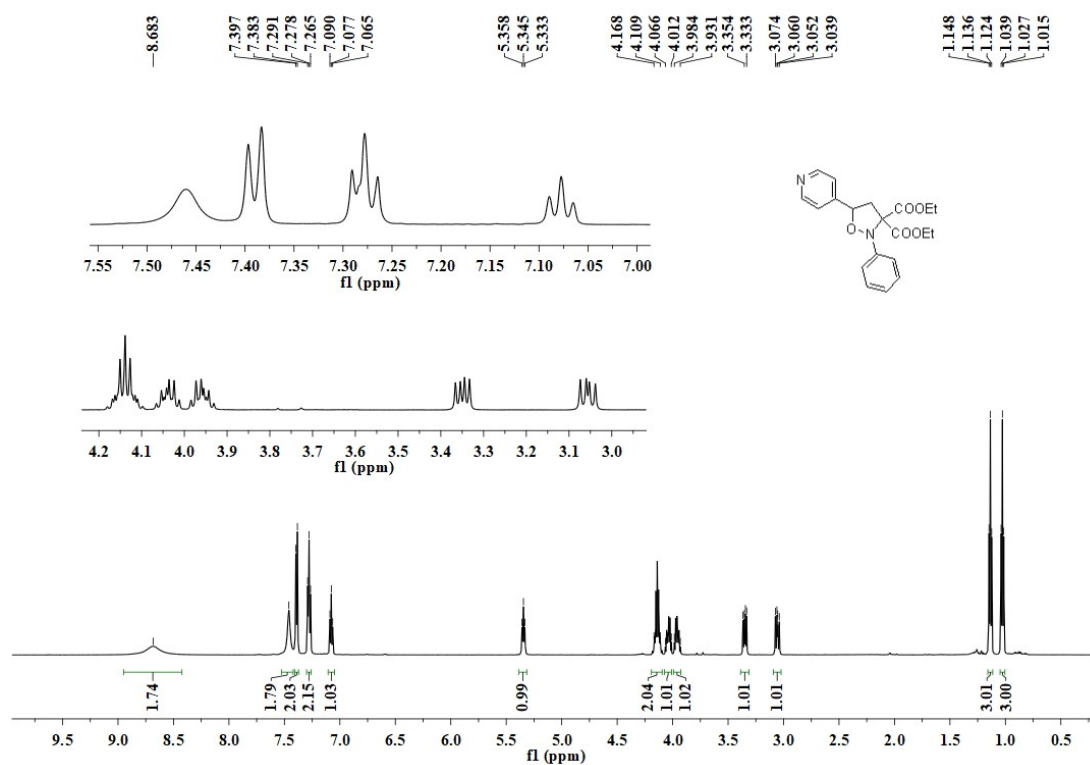

4aak

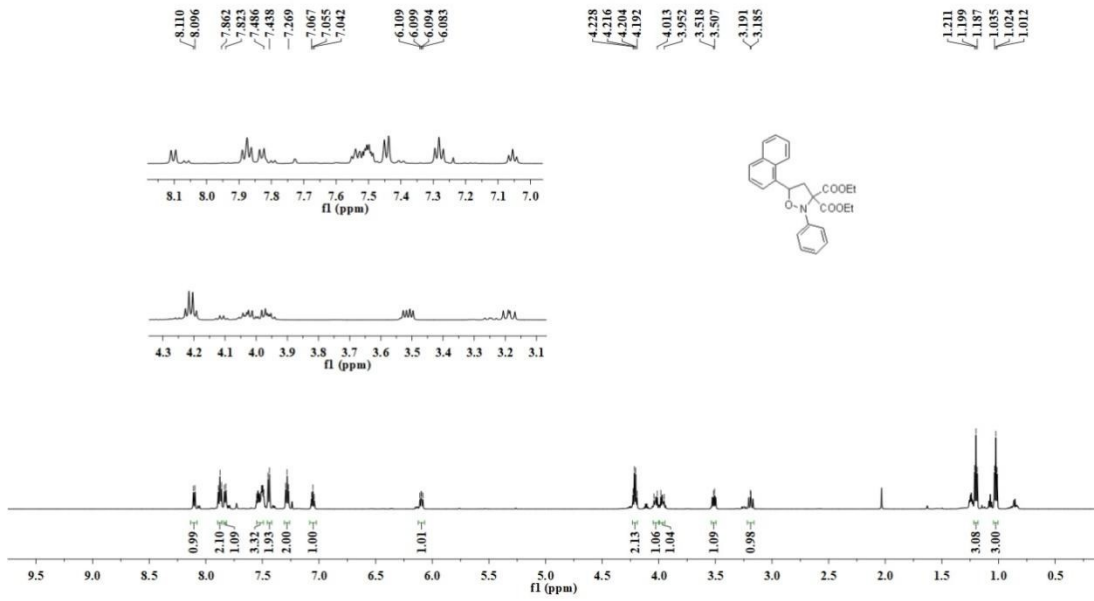

4aal

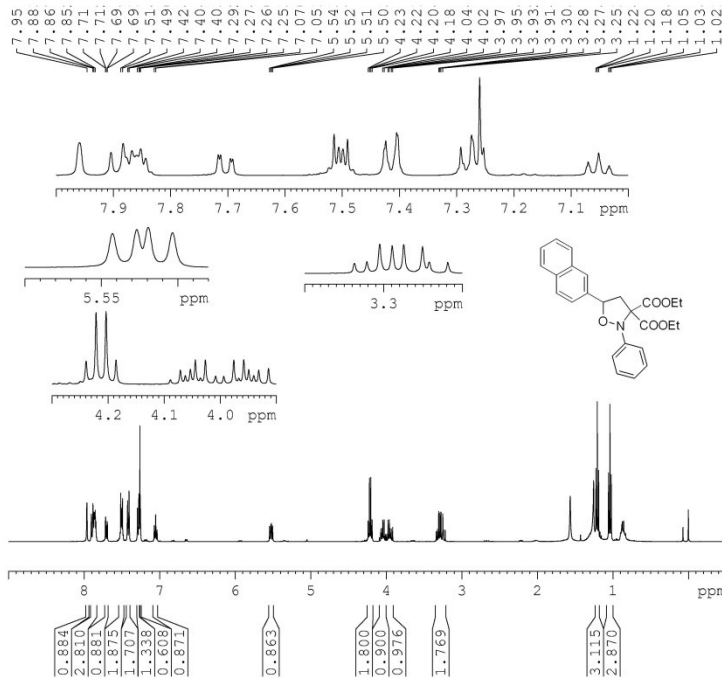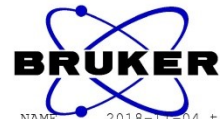

NAME 2018-11-04 tyut  
 EXPNO 6  
 PROCNO 1  
 Date\_ 20181105  
 Time 9.02  
 INSTRUM spect  
 PROBHD 5 mm PABBO BB/  
 PULPROG zg30  
 TD 65536  
 SOLVENT CDCl3  
 NS 16  
 DS 2  
 SWH 8012.820  
 FIDRES 0.122266  
 AQ 4.0894966  
 RG 94.93  
 DW 62.400  
 DE 6.50  
 TE 295.3  
 D1 1.00000000  
 TD0 1

==== CHANNEL f1 ====  
 SF01 400.1324710  
 NUC1 1H  
 P1 9.70  
 SI 65536  
 SF 400.1300103  
 WDW EM  
 SSB 0  
 LB 0.30  
 GB 0  
 PC 1.00

4aam

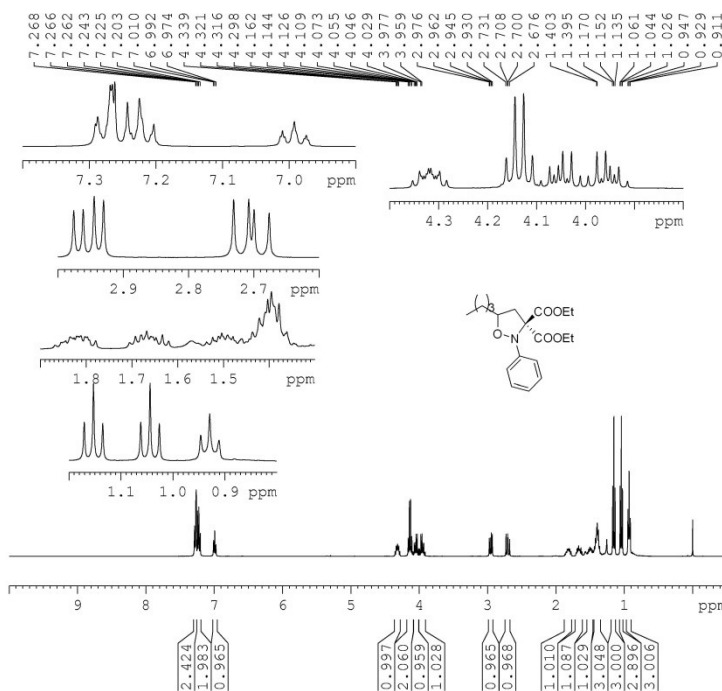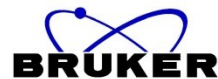

NAME 2018-11-29 tyut  
 EXPNO 32  
 PROCNO 1  
 Date\_ 20181129  
 Time 18.36  
 INSTRUM spect  
 PROBHD 5 mm PABBO BB/  
 PULPROG zg30  
 TD 65536  
 SOLVENT CDCl3  
 NS 16  
 DS 2  
 SWH 8012.820  
 FIDRES 0.122266  
 AQ 4.0894966  
 RG 67.58  
 DW 62.400  
 DE 6.50  
 TE 297.4  
 D1 1.00000000  
 TD0 1

===== CHANNEL f1 =====  
 SFO1 400.1324710  
 NUC1 1H  
 P1 9.70  
 SI 65536  
 SF 400.1300092  
 WDW EM  
 SSB 0  
 LB 0.30  
 GB 0  
 PC 1.00

4aan

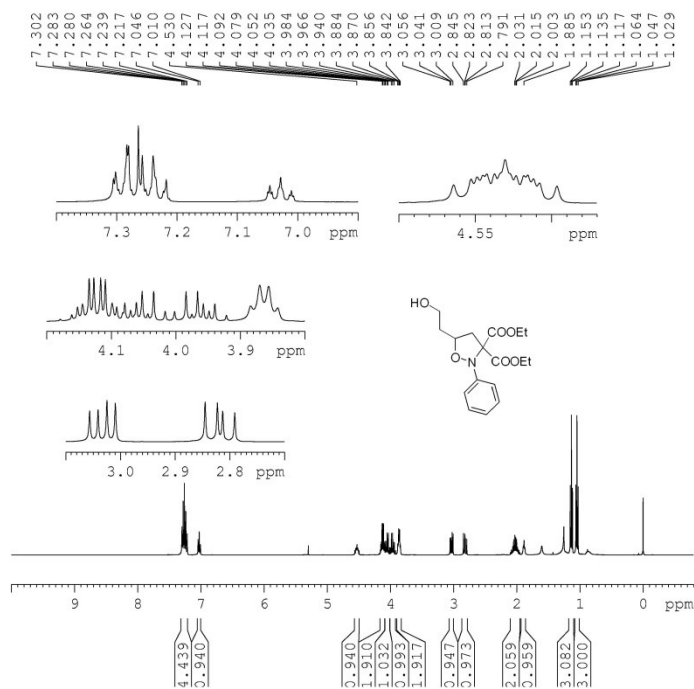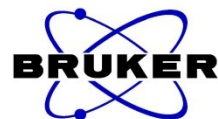

NAME 2018-11-06 tyut-1  
 EXPNO 8  
 PROCNO 1  
 Date\_ 20181106  
 Time 23.03  
 INSTRUM spect  
 PROBHD 5 mm PABBO BB/  
 PULPROG zg30  
 TD 65536  
 SOLVENT CDCl3  
 NS 16  
 DS 2  
 SWH 8012.820 Hz  
 FIDRES 0.122266 Hz  
 AQ 4.0894966 se  
 RG 74.25  
 DW 62.400 us  
 DE 6.50 us  
 TE 295.5 K  
 D1 1.00000000 se  
 TD0 1

===== CHANNEL f1 =====  
 SFO1 400.1324710 MH  
 NUC1 1H  
 P1 9.70 us  
 SI 65536  
 SF 400.1300084 MH  
 WDW EM  
 SSB 0  
 LB 0.30 Hz  
 GB 0  
 PC 1.00

4aao

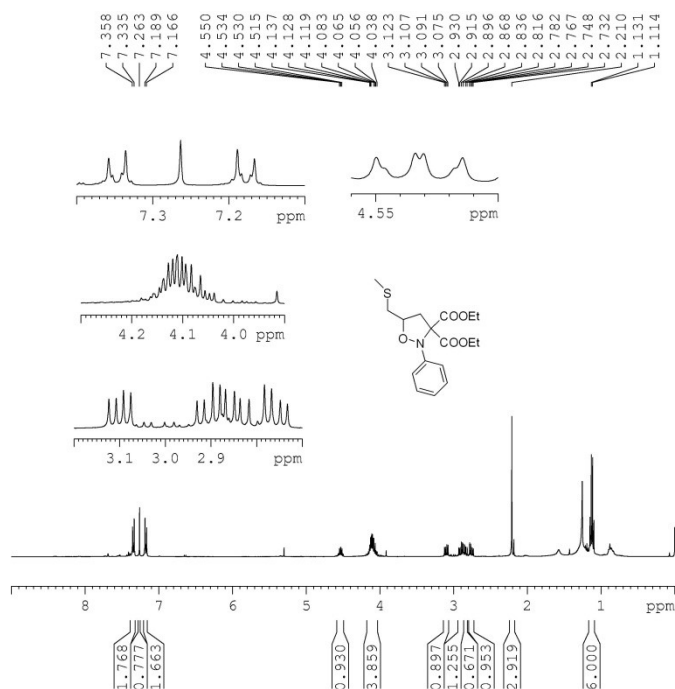

NAME 2018-11-06 tyut-1  
 EXPNO 11  
 PROCNO 1  
 Date\_ 20181106  
 Time 23.11  
 INSTRUM spect  
 PROBHD 5 mm PABBO BB/  
 PULPROG zg30  
 TD 65536  
 SOLVENT CDC13  
 NS 16  
 DS 2  
 SWH 8012.820 Hz  
 FIDRES 0.122266 Hz  
 AQ 4.0894966 se  
 RG 74.25  
 DW 62.400 us  
 DE 6.50 us  
 TE 295.4 K  
 D1 1.00000000 se  
 TD0 1

==== CHANNEL f1 =====  
 SFO1 400.1324710 MH  
 NUC1 1H  
 P1 9.70 us  
 SI 65536  
 SF 400.1300086 MH  
 WDW EM  
 SSB 0  
 LB 0.30 Hz  
 GB 0  
 PC 1.00

4aap

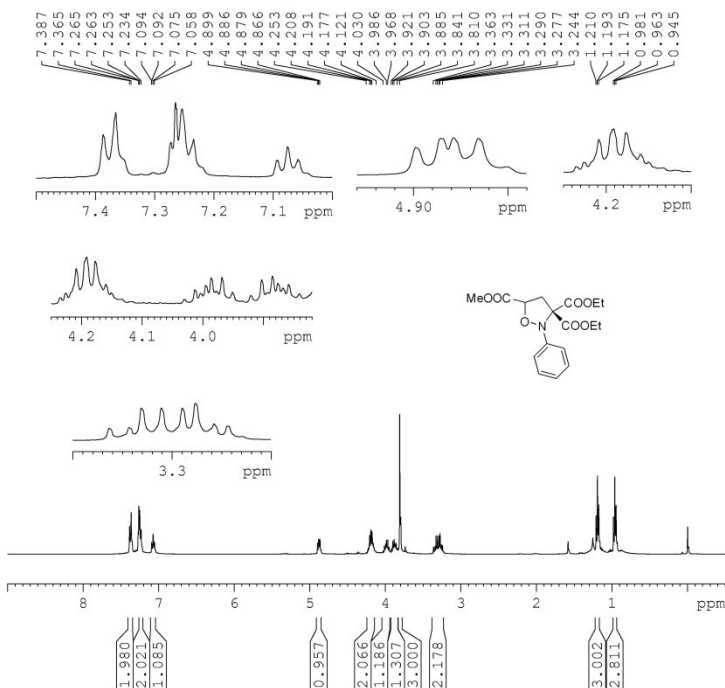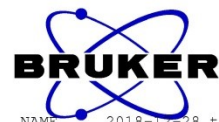

NAME 2018-12-28 tyut  
 EXPNO 18  
 PROCNO 1  
 Date\_ 20181229  
 Time 22.19  
 INSTRUM spect  
 PROBHD 5 mm PABBO BB/  
 PULPROG zg30  
 TD 65536  
 SOLVENT CDC13  
 NS 16  
 DS 2  
 SWH 8012.820  
 FIDRES 0.122266 Hz  
 AQ 4.0894966 se  
 RG 74.25  
 DW 62.400 us  
 DE 6.50 us  
 TE 292.1  
 D1 1.00000000 se  
 TD0 1

==== CHANNEL f1 =====  
 SFO1 400.1324710 MH  
 NUC1 1H  
 P1 9.70 us  
 SI 65536  
 SF 400.1300089 MH  
 WDW EM  
 SSB 0  
 LB 0.30 Hz  
 GB 0  
 PC 1.00



### 4aaq

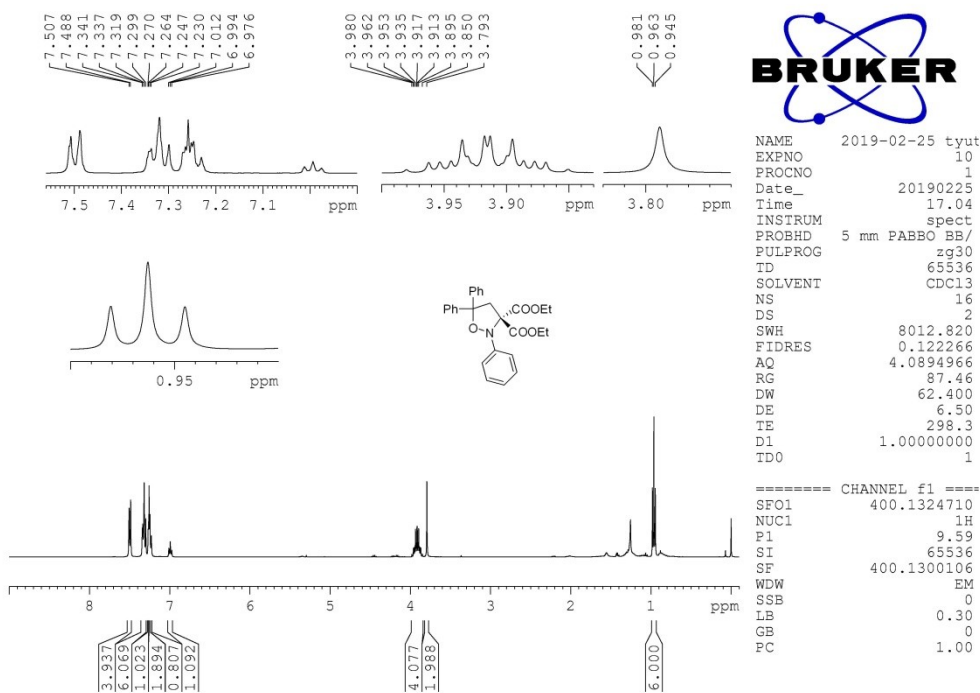

### 4aar

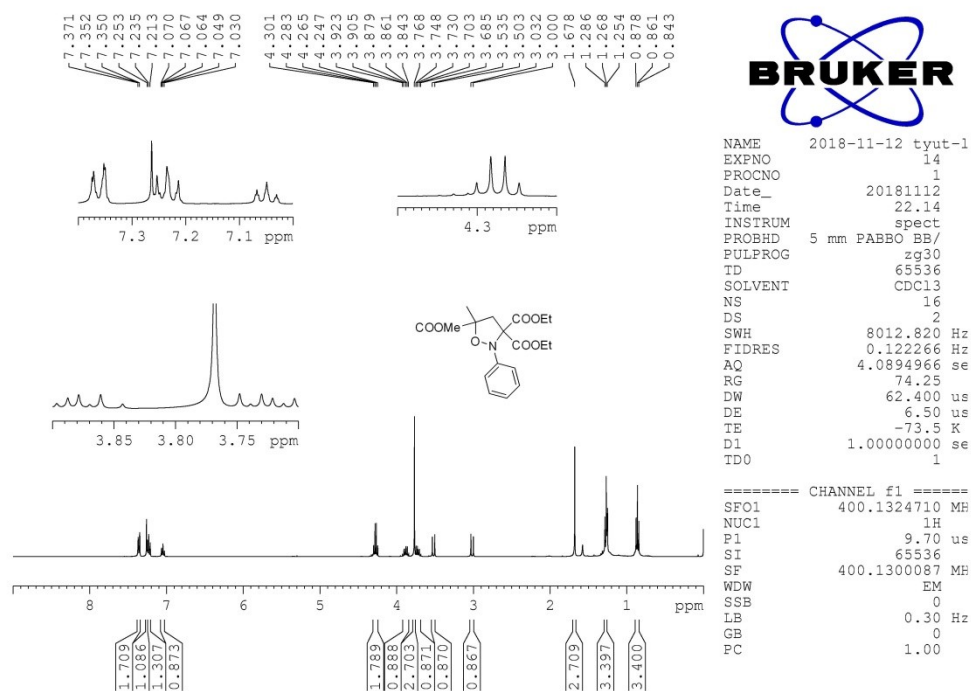

### 4aas

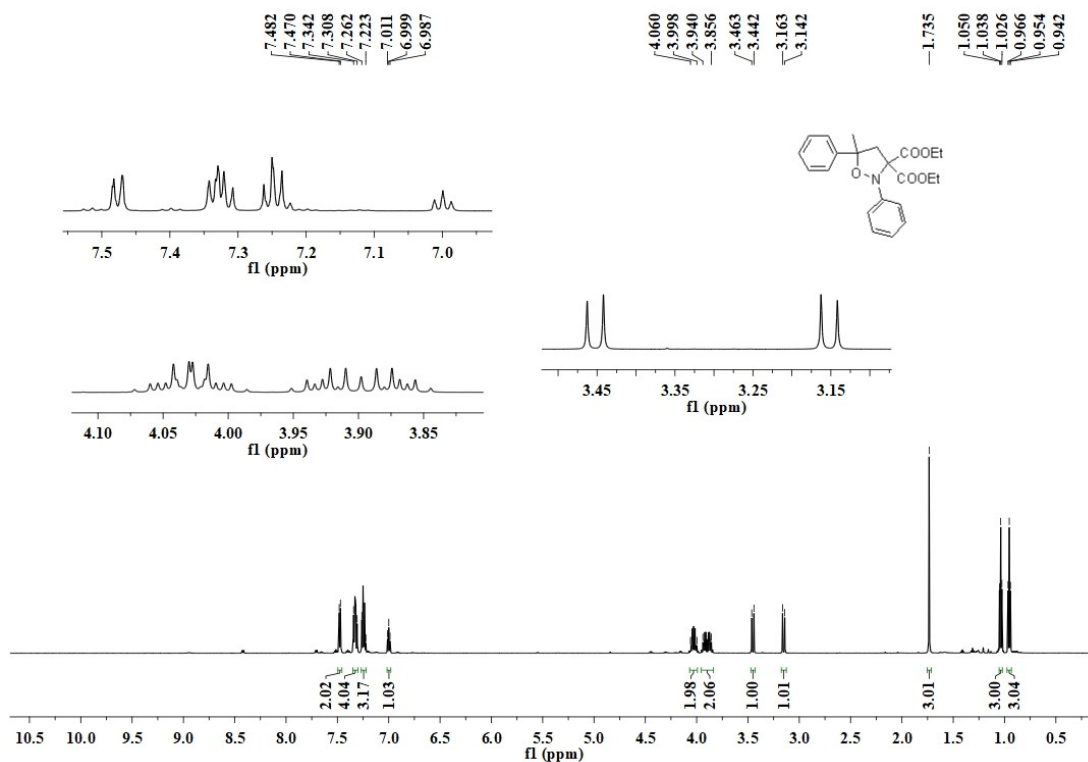

### 4aat

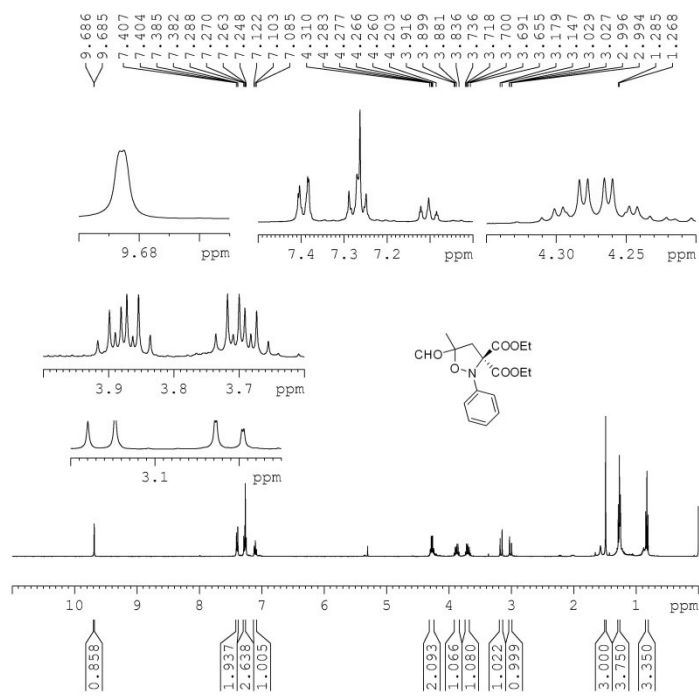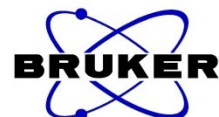

```

NAME      2018-11-20 tyut-1
EXPNO    21
PROCNO    1
Date_    20181120
Time     21.46
INSTRUM  spect
PROBHD   5 mm PABBO BB/
PULPROG  zg30
TD       65536
SOLVENT  CDC13
NS       16
DS       2
SWH      8012.820 Hz
FIDRES   0.122266 Hz
AQ       4.0894966 se
RG       87.46
DW       62.400 us
DE       6.50 us
TE       294.6 K
D1       1.00000000 se
TD0      1
  
```

```

===== CHANNEL f1 =====
SFO1    400.1324710 MH
NUC1     1H
P1      9.70 us
SI      65536
SF      400.1300091 MH
WDW      EM
SSB      0
LB      0.30 Hz
GB      0
PC      1.00
  
```

4auu

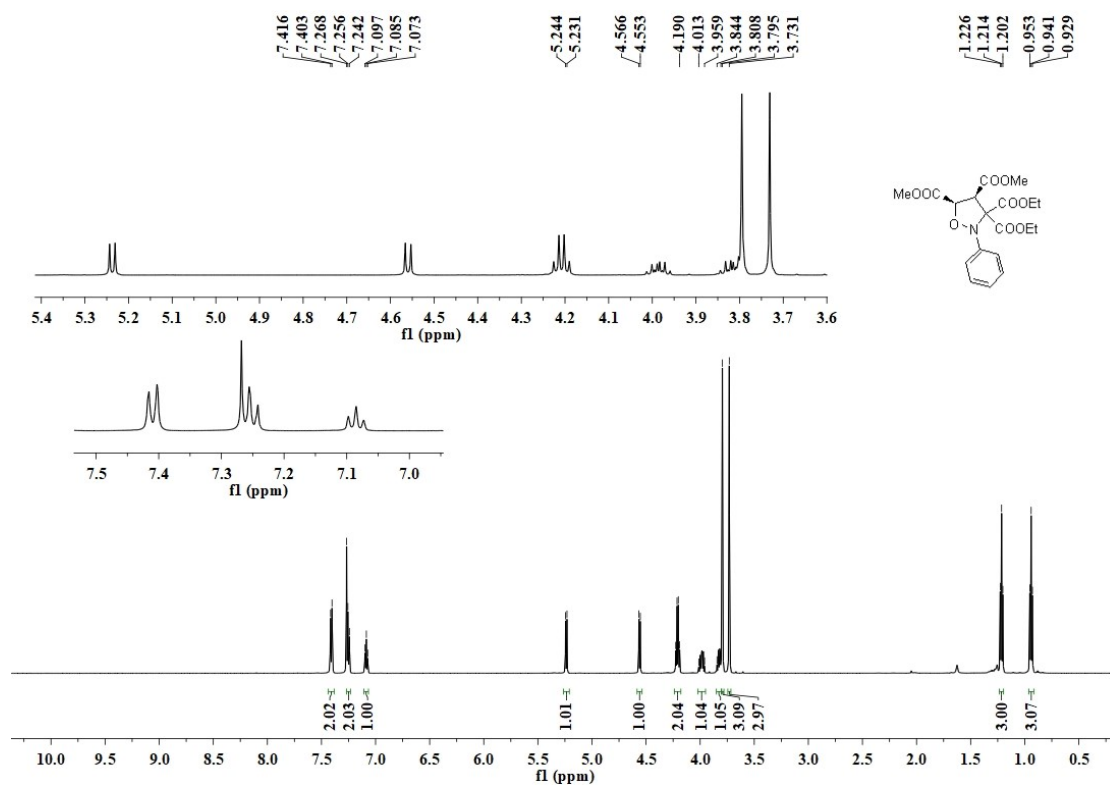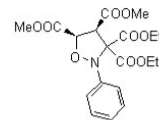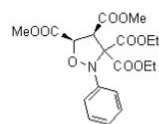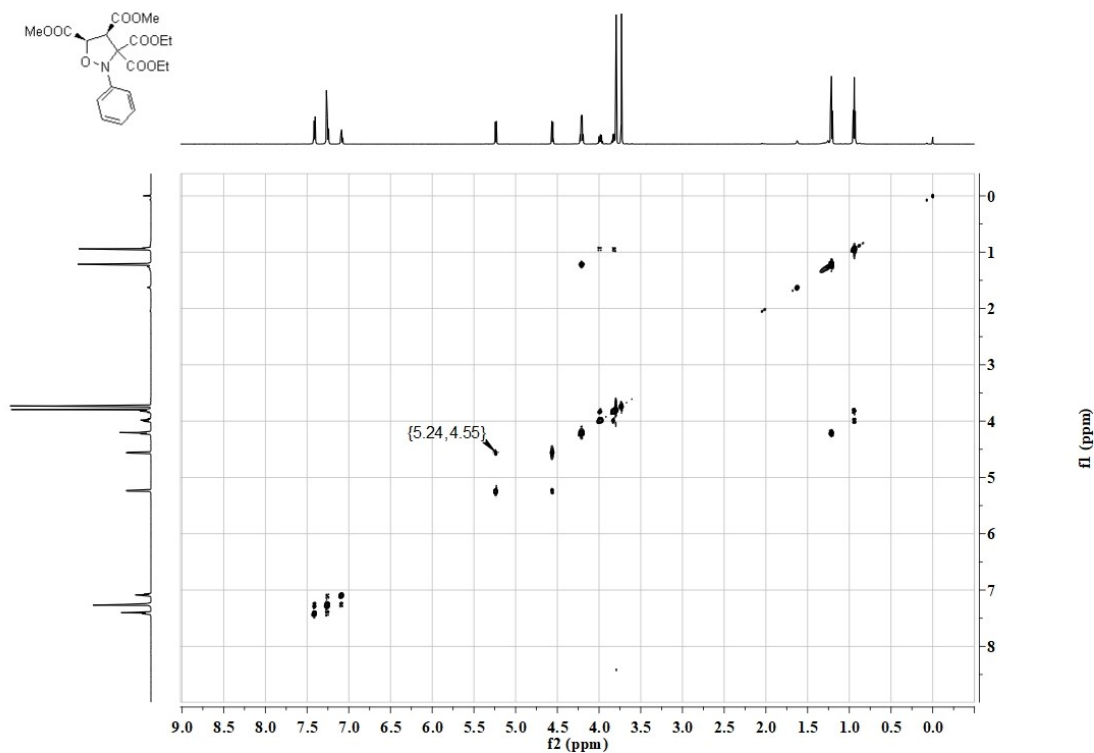

**4aav**

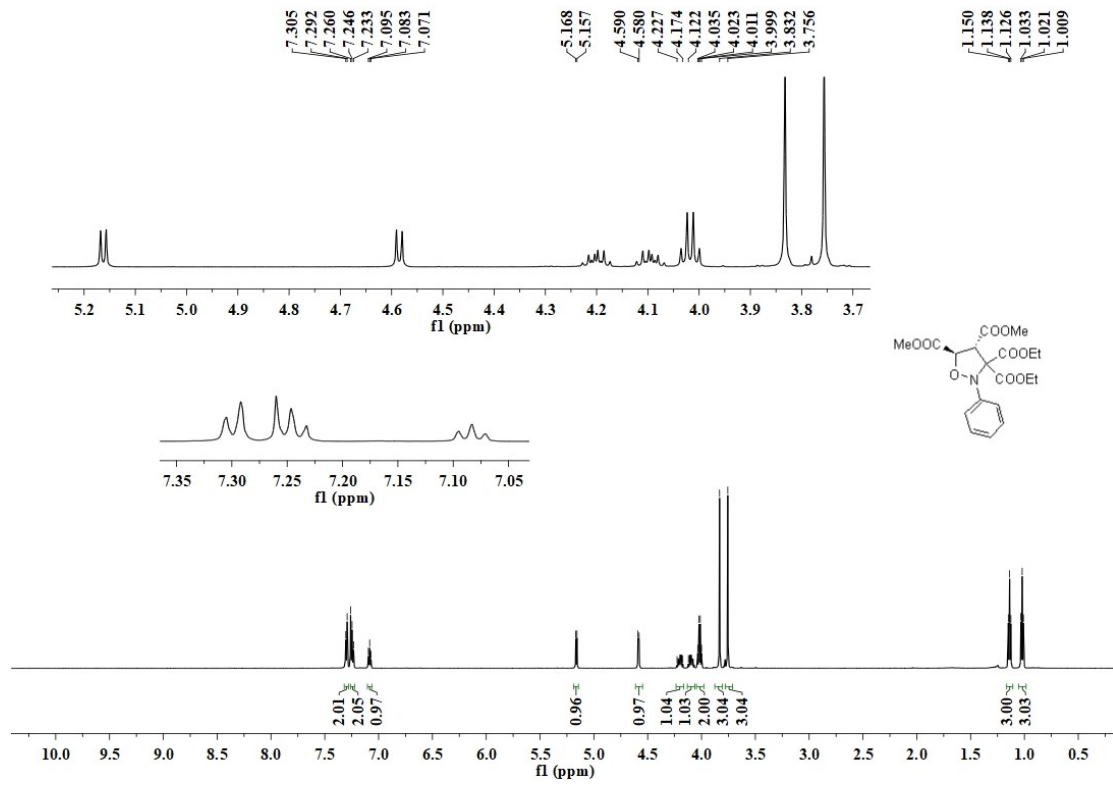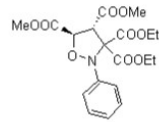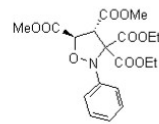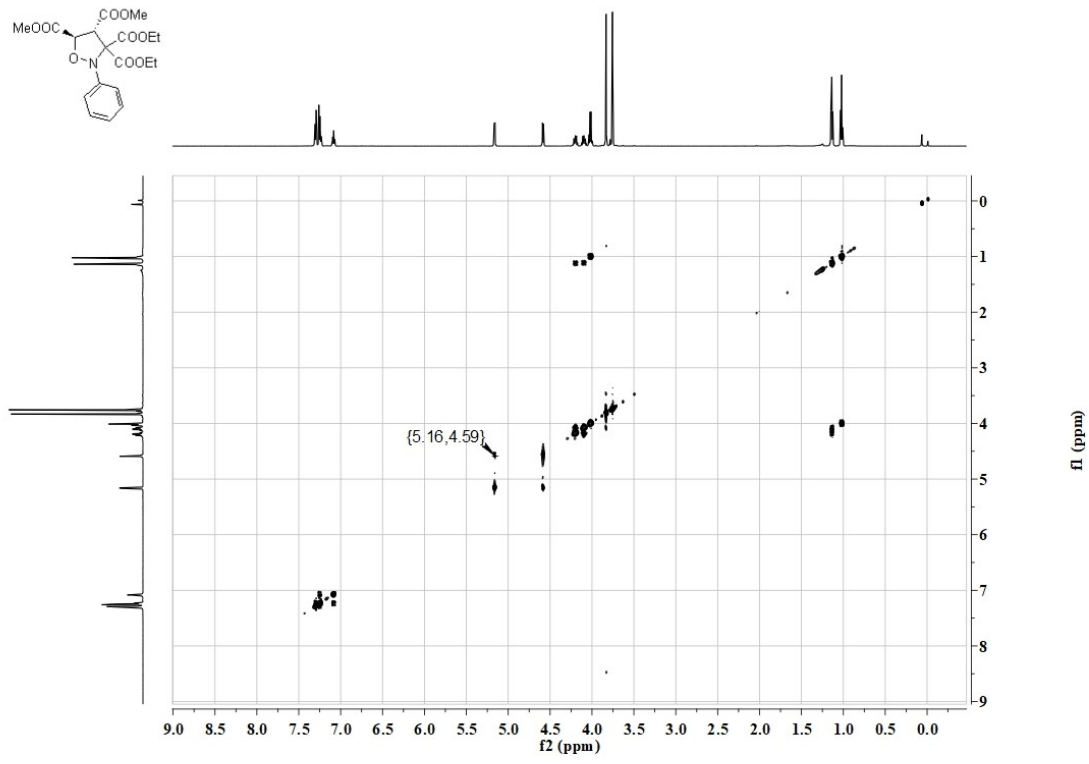

4aaw

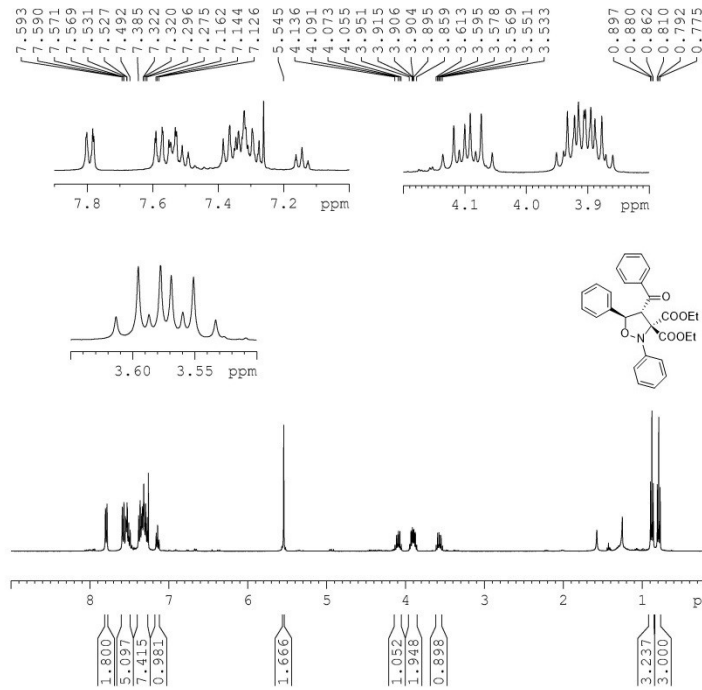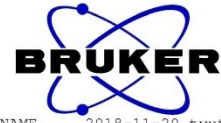

NAME 2018-11-20 tyut  
 EXPNO 20  
 PROCNO 1  
 Date\_ 20181120  
 Time 21.42  
 INSTRUM spect  
 PROBHD 5 mm PABBO BB/  
 PULPROG zg30  
 TD 65536  
 SOLVENT CDCl3  
 NS 16  
 DS 2  
 SWH 8012.820  
 FIDRES 0.122266  
 AQ 4.0894966  
 RG 74.25  
 DW 62.400  
 DE 6.50  
 TE 294.6  
 D1 1.00000000  
 TD0 1

===== CHANNEL f1 =====  
 SFO1 400.1324710  
 NUC1 1H  
 P1 9.70  
 SI 65536  
 SF 400.1300096  
 WDW EM  
 SSB 0  
 LB 0.30  
 GB 0  
 PC 1.00

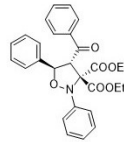

4aax

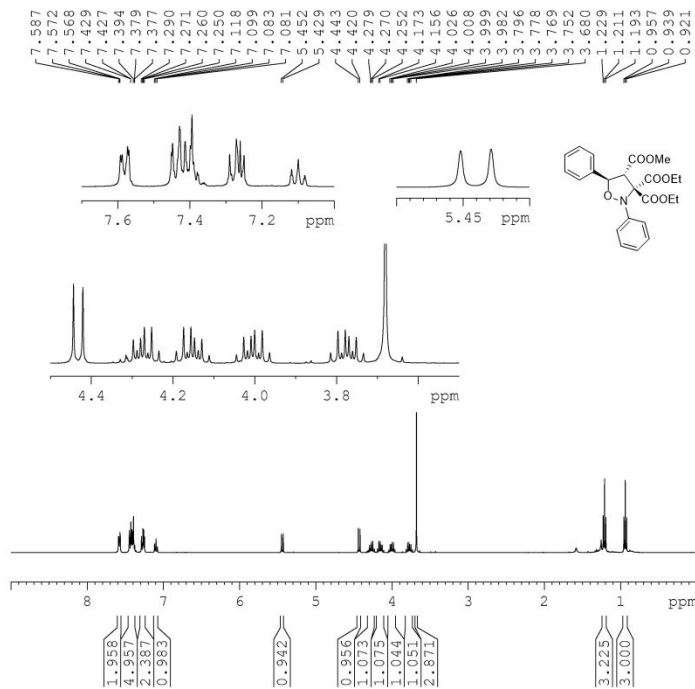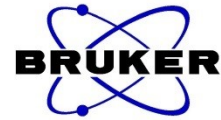

NAME 2018-11-14 tyut-1  
 EXPNO 16  
 PROCNO 1  
 Date\_ 20181114  
 Time 17.25  
 INSTRUM spect  
 PROBHD 5 mm PABBO BB/  
 PULPROG zg30  
 TD 65536  
 SOLVENT CDCl3  
 NS 16  
 DS 2  
 SWH 8012.820 Hz  
 FIDRES 0.122266 Hz  
 AQ 4.0894966 se  
 RG 67.58  
 DW 62.400 us  
 DE 6.50 us  
 TE 296.0 K  
 D1 1.00000000 se  
 TD0 1

===== CHANNEL f1 =====  
 SFO1 400.1324710 MH  
 NUC1 1H  
 P1 9.70 us  
 SI 65536  
 SF 400.1300098 MH  
 WDW EM  
 SSB 0  
 LB 0.30 Hz  
 GB 0  
 PC 1.00

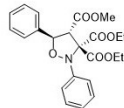

### 4aay

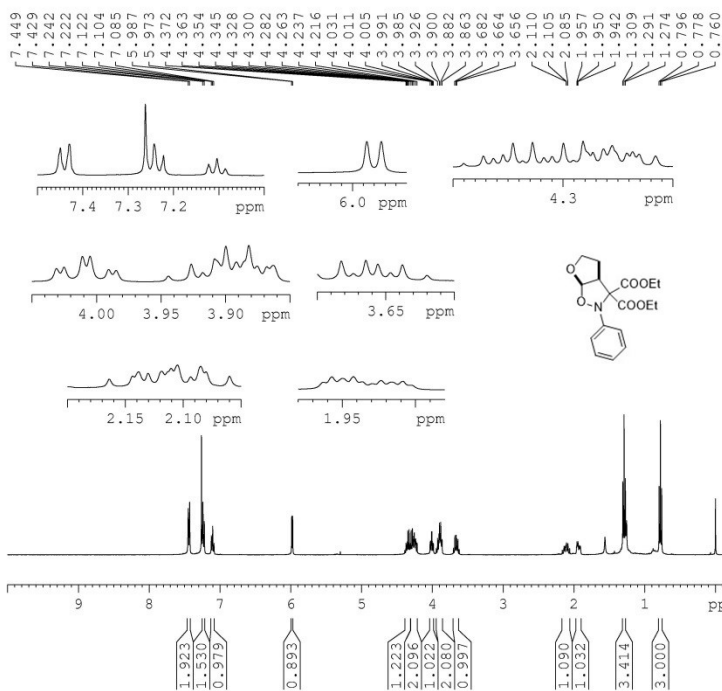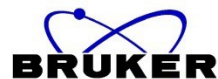

NAME 2018-11-29 tyut  
EXPNO 31  
PROCNO 1  
Date\_ 20181129  
Time 18.32  
INSTRUM spect  
PROBHD 5 mm PABBO BB/  
PULPROG zg30  
TD 65536  
SOLVENT CDC13  
NS 16  
DS 2  
SWH 8012.820  
FIDRES 0.122266  
AQ 4.0894966  
RG 94.93  
DW 62.400  
DE 6.50  
TE 297.4  
D1 1.00000000  
TD0 1

===== CHANNEL f1 =====  
SFO1 400.1324710  
NUC1 1H  
P1 9.70  
SI 65536  
SF 400.1300093  
WDW EM  
SSB 0  
LB 0.30  
GB 0  
PC 1.00

### 4baa

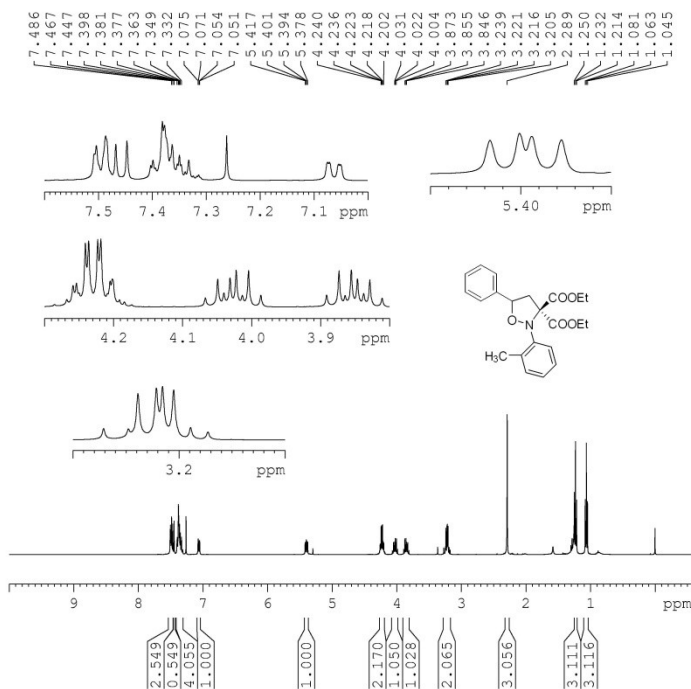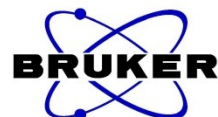

NAME 2018-11-20 tyut-1  
EXPNO 23  
PROCNO 1  
Date\_ 20181120  
Time 21.54  
INSTRUM spect  
PROBHD 5 mm PABBO BB/  
PULPROG zg30  
TD 65536  
SOLVENT CDC13  
NS 16  
DS 2  
SWH 8012.820 Hz  
FIDRES 0.122266 Hz  
AQ 4.0894966 se  
RG 67.58  
DW 62.400 us  
DE 6.50 us  
TE 294.6 K  
D1 1.00000000 se  
TD0 1

===== CHANNEL f1 =====  
SFO1 400.1324710 MH  
NUC1 1H  
P1 9.70 us  
SI 65536  
SF 400.1300095 MH  
WDW EM  
SSB 0  
LB 0.30 Hz  
GB 0  
PC 1.00

### 4caa

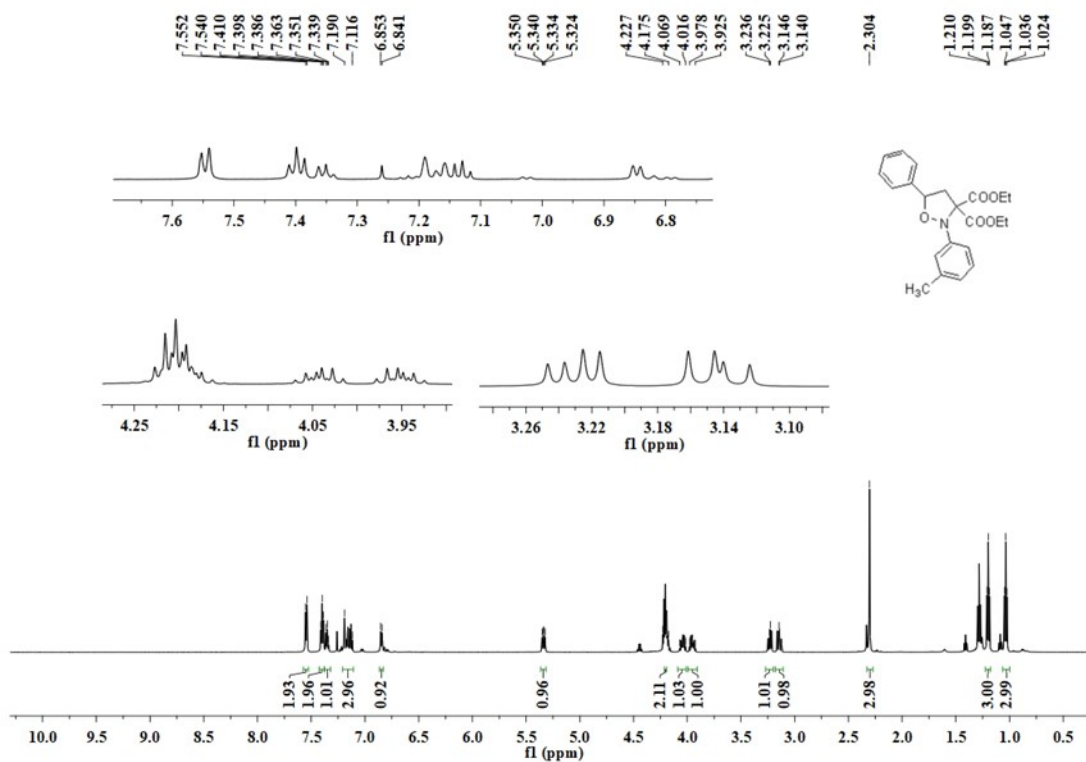

### 4daa

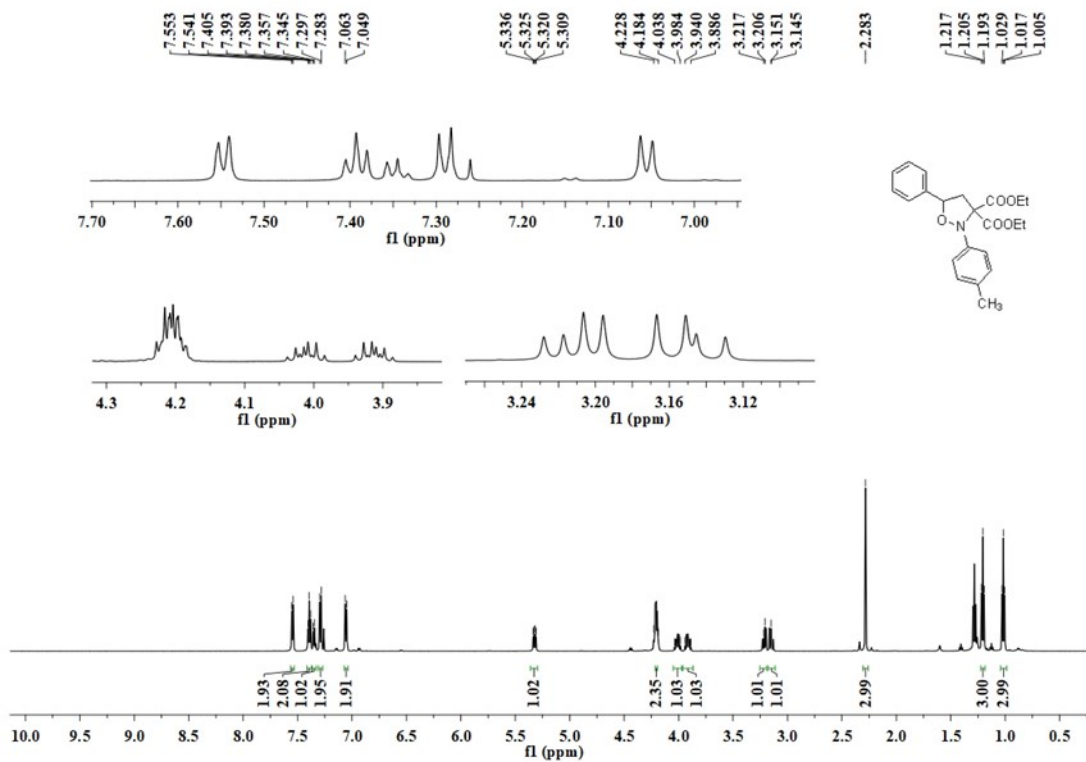

4eaa

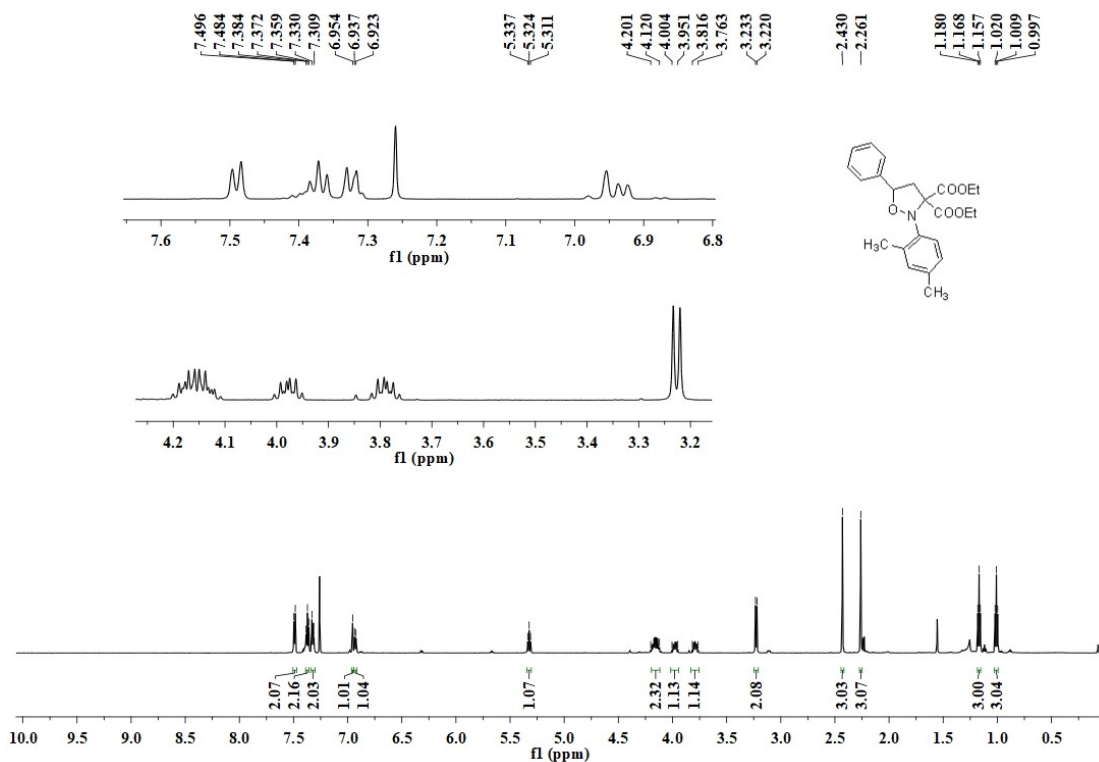

4faa

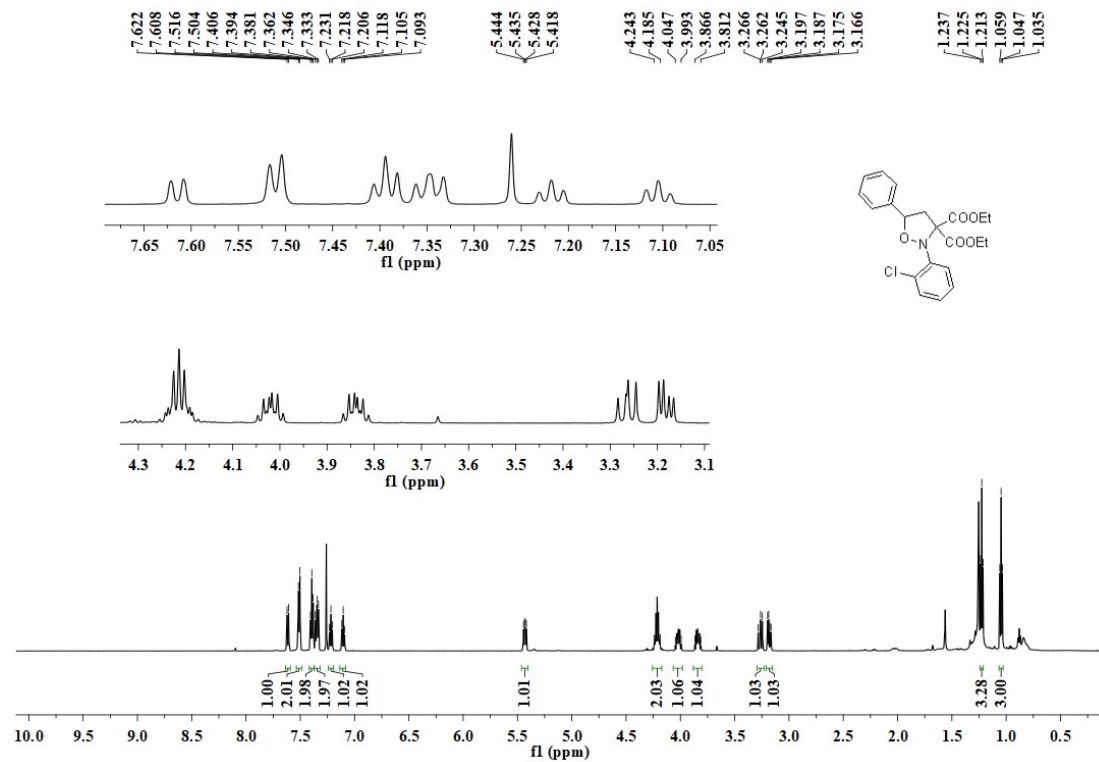



### 4gaa

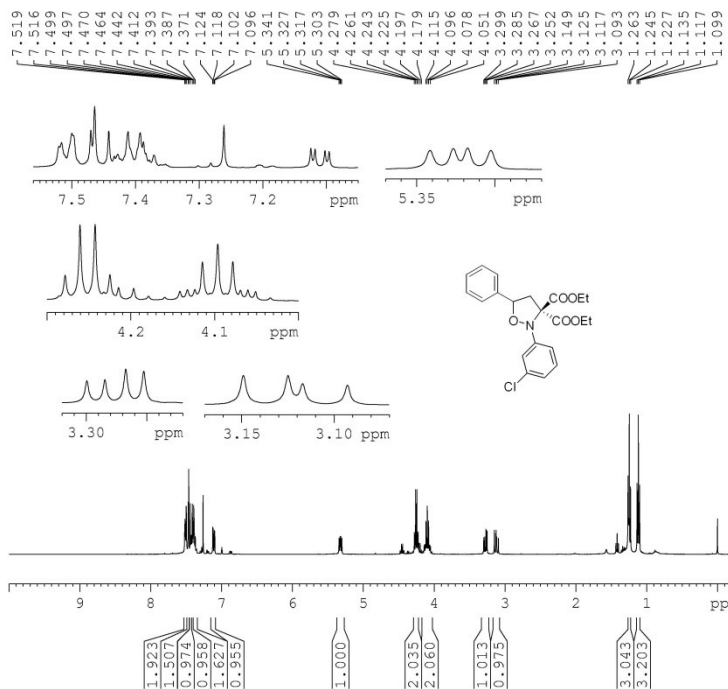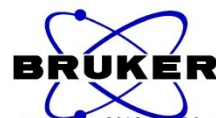

```

NAME      2018-12-06 tyut
EXPNO     34
PROCNO    1
Date_     20181206
Time      23.02
INSTRUM   spect
PROBHD    5 mm PABBO BB/
PULPROG   zg30
TD         65536
SOLVENT   CDCl3
NS         16
DS         2
SWH        8012.820
FIDRES    0.122266
AQ         4.0894966
RG         67.58
DW         62.400
DE         6.50
TE         293.3
D1         1.00000000
D0         1

===== CHANNEL f1 =====
SFO1      400.1324710
NUC1       1H
P1         9.70
SI         65536
SF         400.1300094
WDW        EM
SSB        0
LB         0.30
GB         0
PC         1.00
    
```

### 4haa

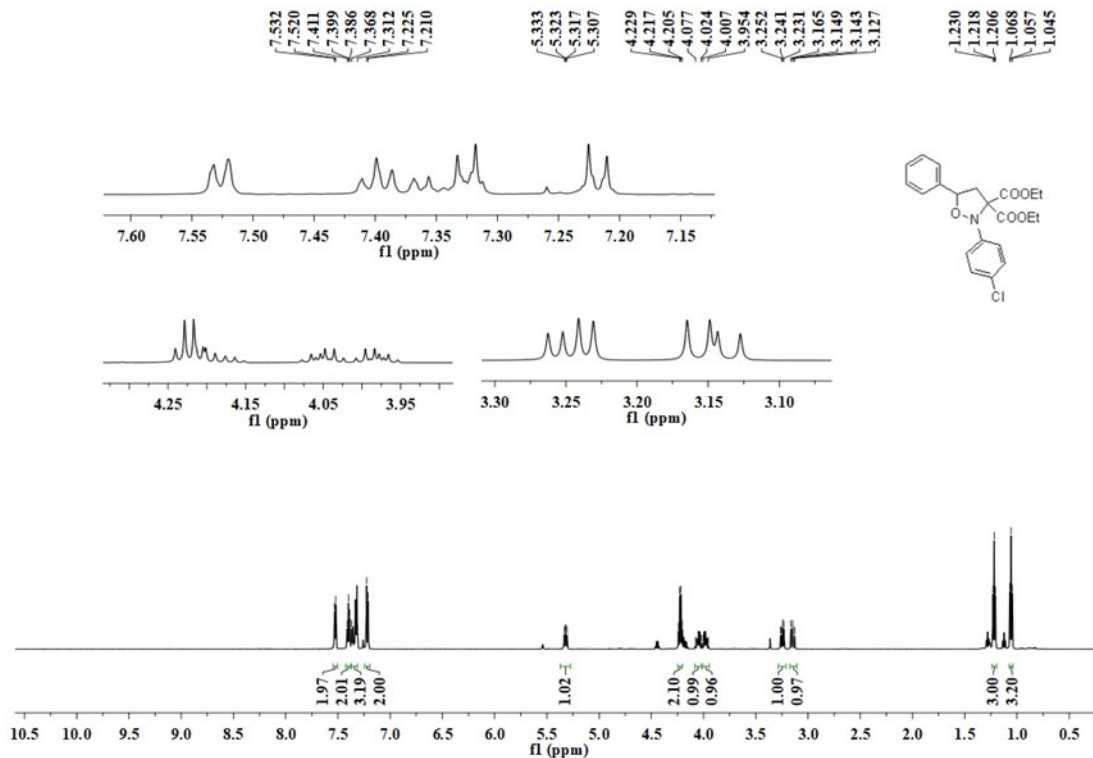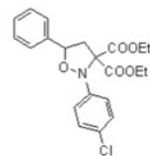

4iaa

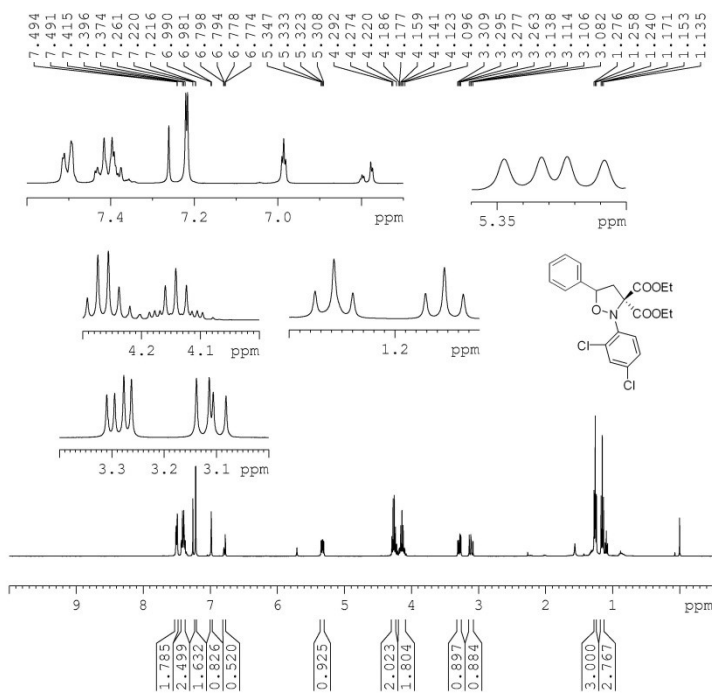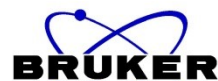

NAME 2018-11-27 tyut  
 EXPNO 29  
 PROCNO 1  
 Date\_ 20181127  
 Time 17.57  
 INSTRUM spect  
 PROBHD 5 mm PABBO BB/  
 PULPROG zg30  
 TD 65536  
 SOLVENT CDCl3  
 NS 16  
 DS 2  
 SWH 8012.820  
 FIDRES 0.122266  
 AQ 4.0894966  
 RG 87.46  
 DW 62.400  
 DE 6.50  
 TE 294.1  
 D1 1.00000000  
 TD0 1

==== CHANNEL f1 ====  
 SFO1 400.1324710  
 NUC1 1H  
 P1 9.70  
 SI 65536  
 SF 400.1300095  
 WDW EM  
 SSB 0  
 LB 0.30  
 GB 0  
 PC 1.00

4aba

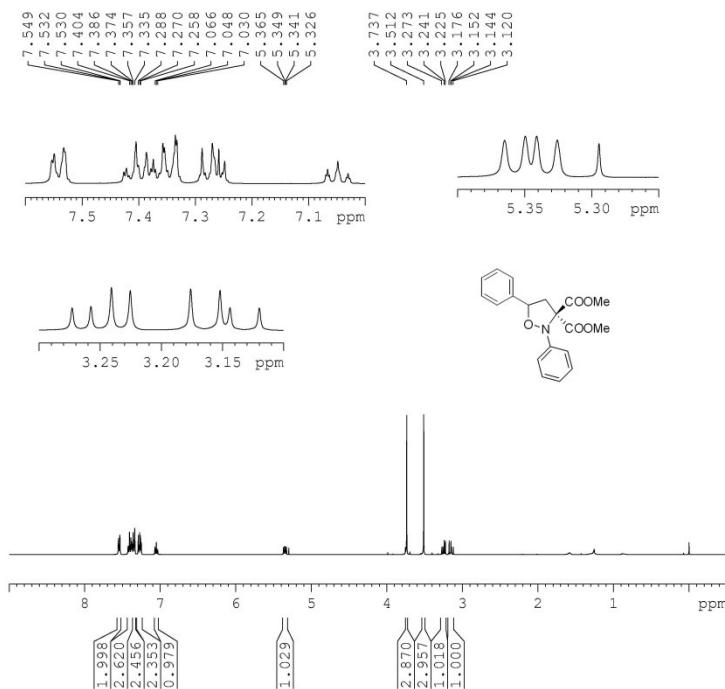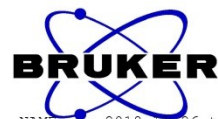

NAME 2018-11-26 tyut  
 EXPNO 26  
 PROCNO 1  
 Date\_ 20181126  
 Time 22.33  
 INSTRUM spect  
 PROBHD 5 mm PABBO BB/  
 PULPROG zg30  
 TD 65536  
 SOLVENT CDCl3  
 NS 16  
 DS 2  
 SWH 8012.820  
 FIDRES 0.122266  
 AQ 4.0894966  
 RG 67.58  
 DW 62.400  
 DE 6.50  
 TE 294.1  
 D1 1.00000000  
 TD0 1

==== CHANNEL f1 ====  
 SFO1 400.1324710  
 NUC1 1H  
 P1 9.70  
 SI 65536  
 SF 400.1300107  
 WDW EM  
 SSB 0  
 LB 0.30  
 GB 0  
 PC 1.00

### 4aca

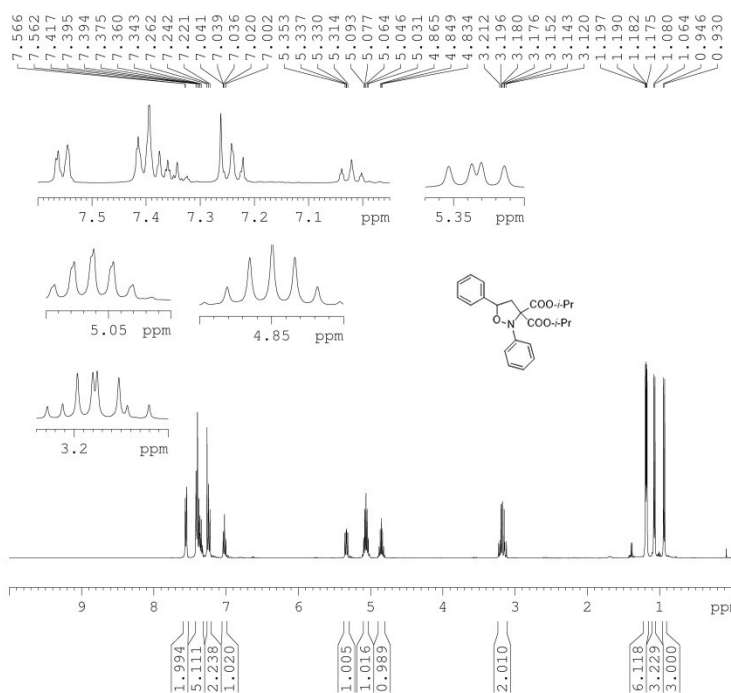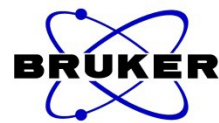

```

NAME      20191221-13
EXPNO     1
PROCNO    1
Date_     20191221
Time      16.30
INSTRUM   spect
PROBHD    Z116098_0711 (
PULPROG   zg30
TD        65536
SOLVENT   CDC13
NS        16
DS        2
SWH       8012.820
FIDRES    0.244532
AQ        4.0894966
RG        32.73
DW        62.400
DE        6.50
TE        294.8
D1        1.0000000
TD0       1
SFO1      400.1324708
NUC1      1H
P1        9.76
SI        65536
SF        400.1300084
WDW       EM
SSB       0
LB        0.30
GB        0
PC        1.00
    
```

### 4ada

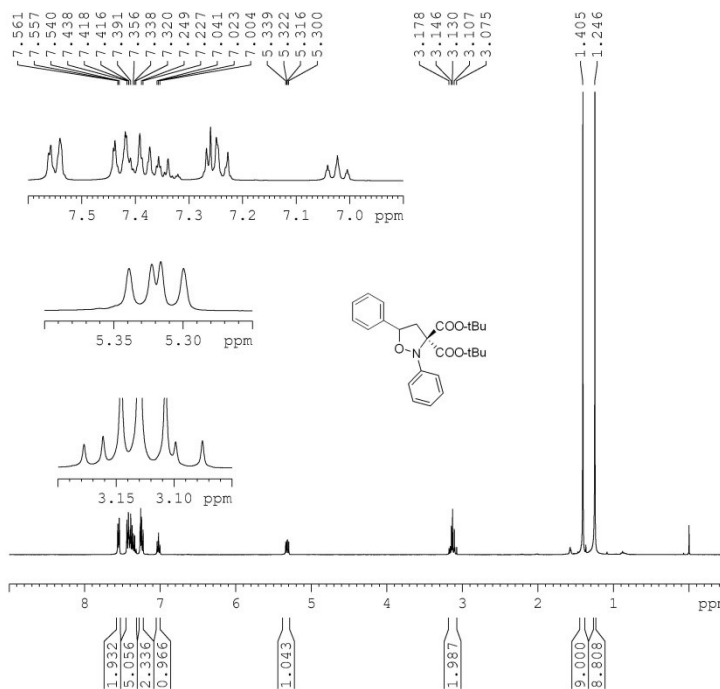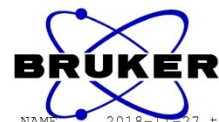

```

NAME      2018-11-27 tyut
EXPNO     28
PROCNO    1
Date_     20181127
Time      17.53
INSTRUM   spect
PROBHD    5 mm PABBO BB/
PULPROG   zg30
TD        65536
SOLVENT   CDC13
NS        16
DS        2
SWH       8012.820
FIDRES    0.122266
AQ        4.0894966
RG        67.58
DW        62.400
DE        6.50
TE        294.1
D1        1.0000000
TD0       1

===== CHANNEL f1 =====
SFO1      400.1324710
NUC1      1H
P1        9.70
SI        65536
SF        400.1300099
WDW       EM
SSB       0
LB        0.30
GB        0
PC        1.00
    
```
